# Supplementary material for: Iridium-catalyzed reduction of o-hydroxyl phenyl enaminones for the synthesis of propiophenones and their application in 3-methyl chromone synthesis
Source: Royal Society of Chemistry journal article supplement (doi:10.1039/d4ob01359j), 2024-01-01
Supplement: d4ob01359j1.pdf [file d4ob01359j1.pdf]

**Iridium-Catalyzed Reduction of *o*-Hydroxyl Phenyl Enaminones  
for the Synthesis Propiophenones and Their Application in  
3-Methyl Chromone Synthesis**

Zhi Tu,<sup>a</sup> Jie-Ping Wan,<sup>a</sup> Li Wei,\* Yunyun Liu<sup>a\*</sup>

<sup>a</sup>College of Chemistry and Materials, Jiangxi Normal University, Nanchang 330022,  
China

Email: chemliuyunyun@jxnu.edu.cn; wl@jxnu.edu.cn

**Contents**

NMR spectra of all products.....S2-S23

# <sup>1</sup>H and <sup>13</sup>C NMR spectra of all products

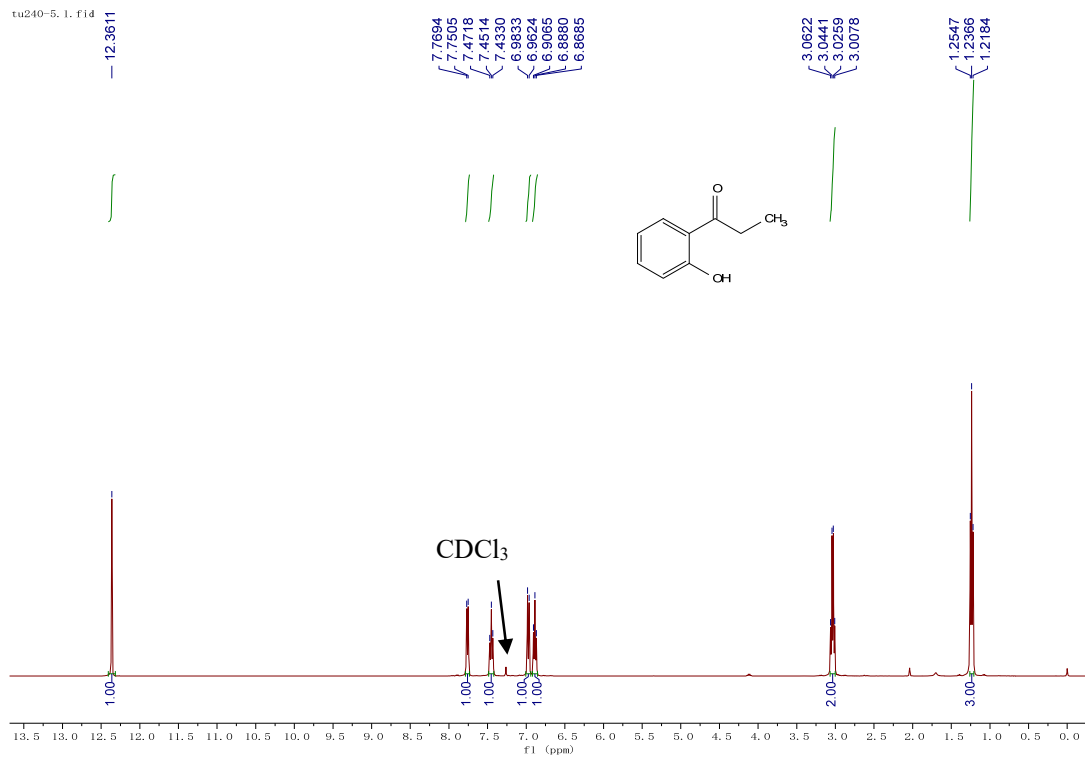

<sup>1</sup>H NMR spectrum of **3a** (400 MHz, CDCl<sub>3</sub>)

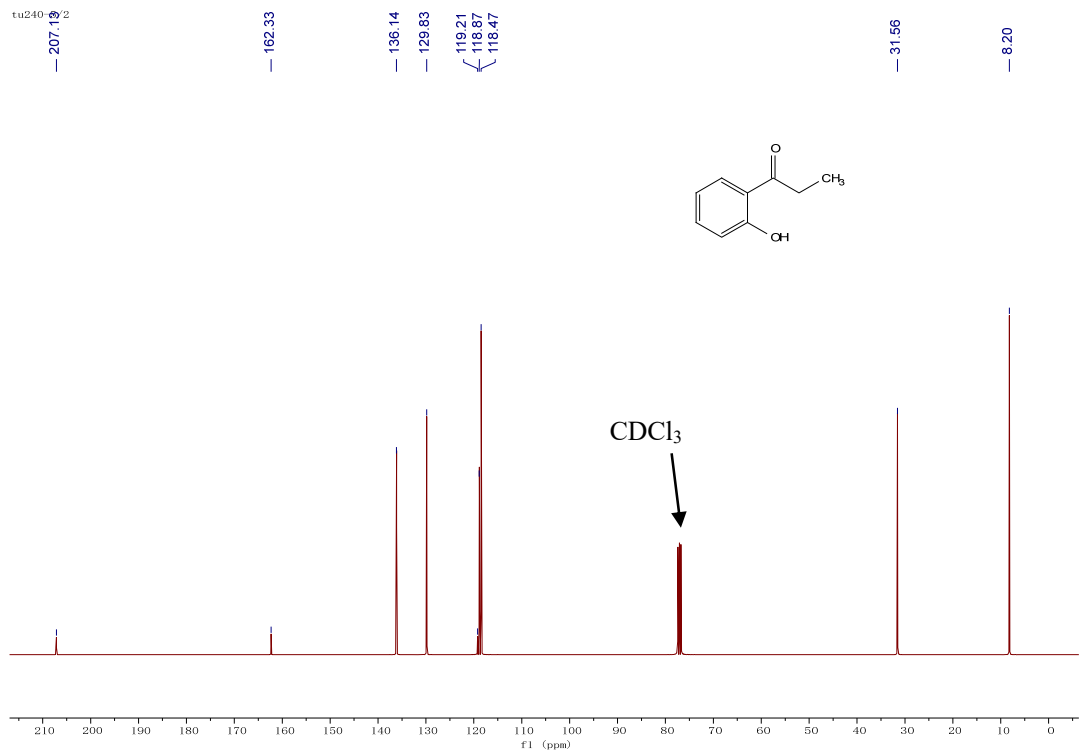

<sup>13</sup>C NMR spectrum of **3a** (100 MHz, CDCl<sub>3</sub>)

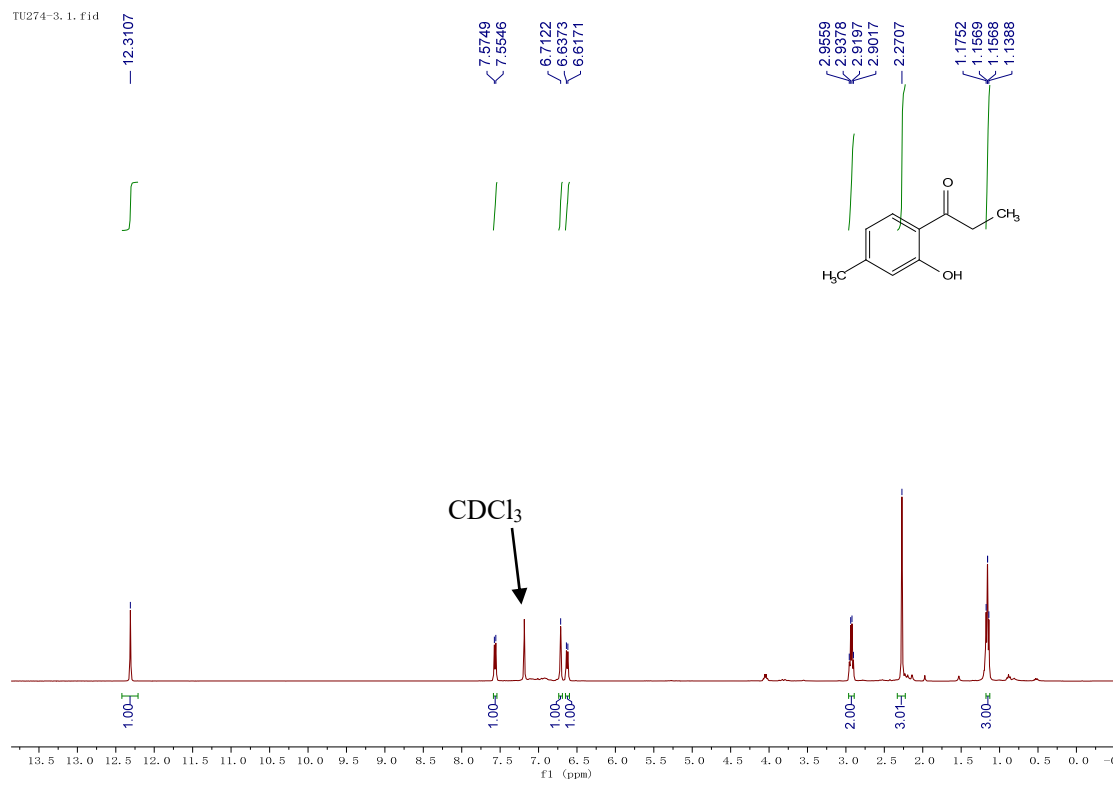

<sup>1</sup>H NMR spectrum of **3b** (400 MHz, CDCl<sub>3</sub>)

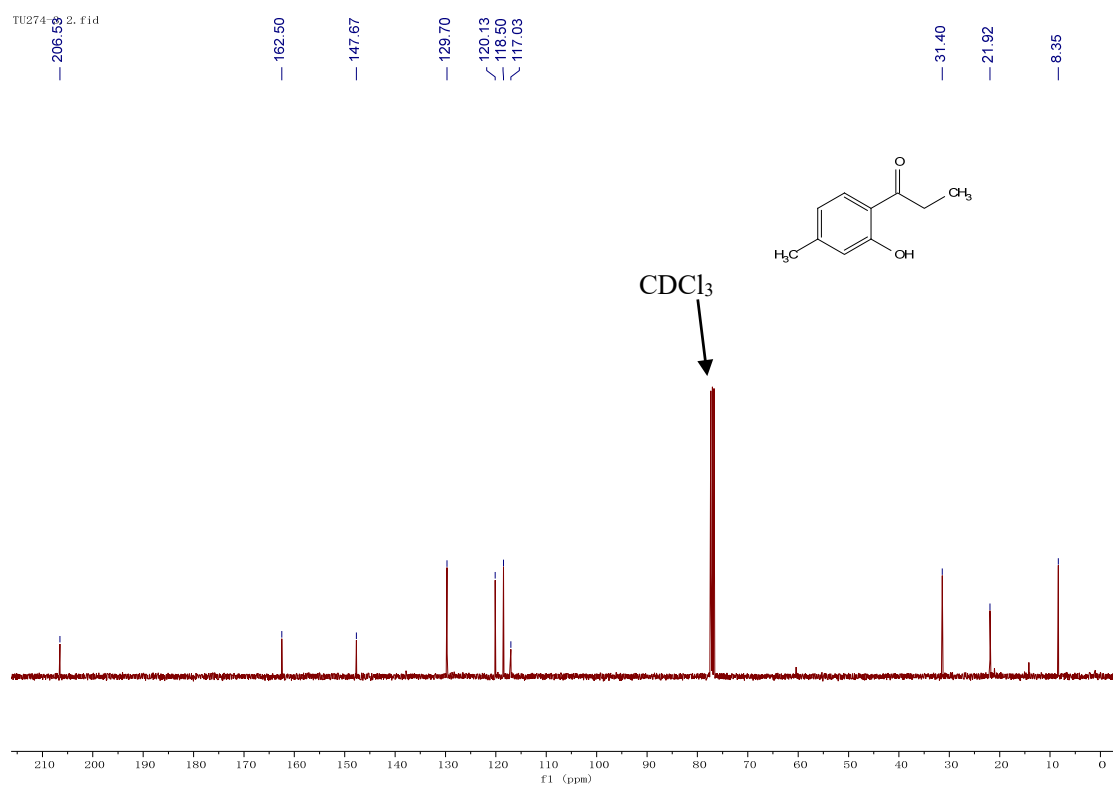

<sup>13</sup>C NMR spectrum of **3b** (100 MHz, CDCl<sub>3</sub>)

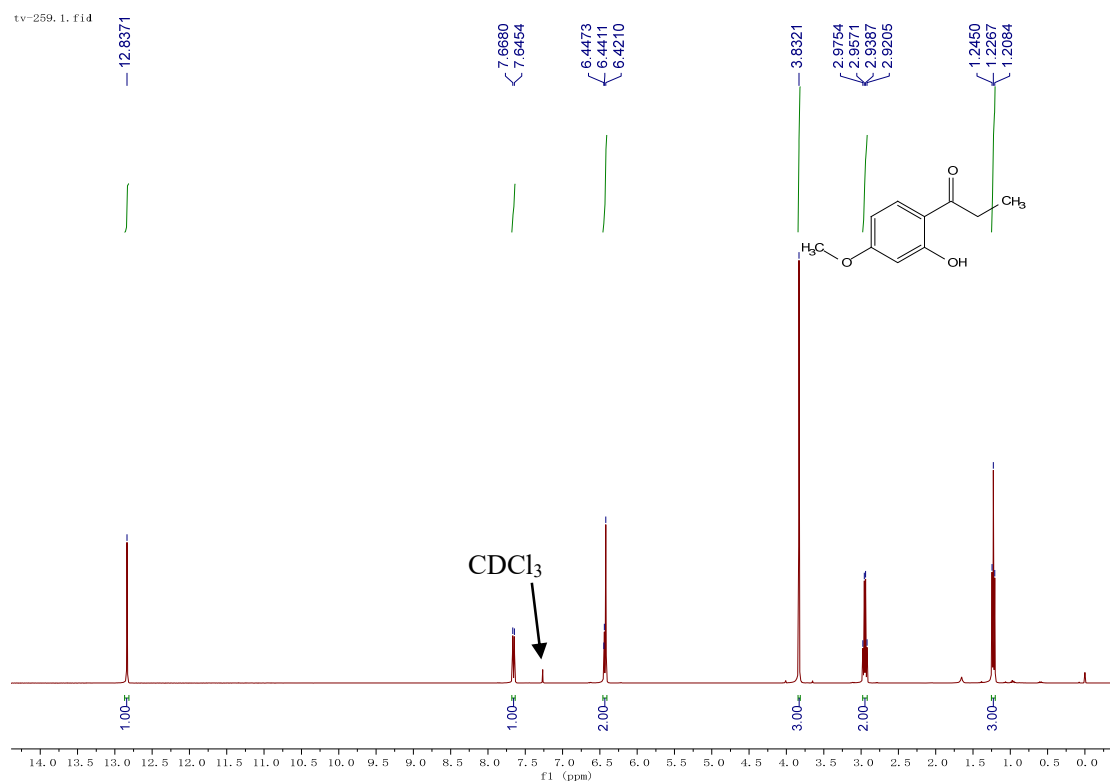

<sup>1</sup>H NMR spectrum of **3c** (400 MHz, CDCl<sub>3</sub>)

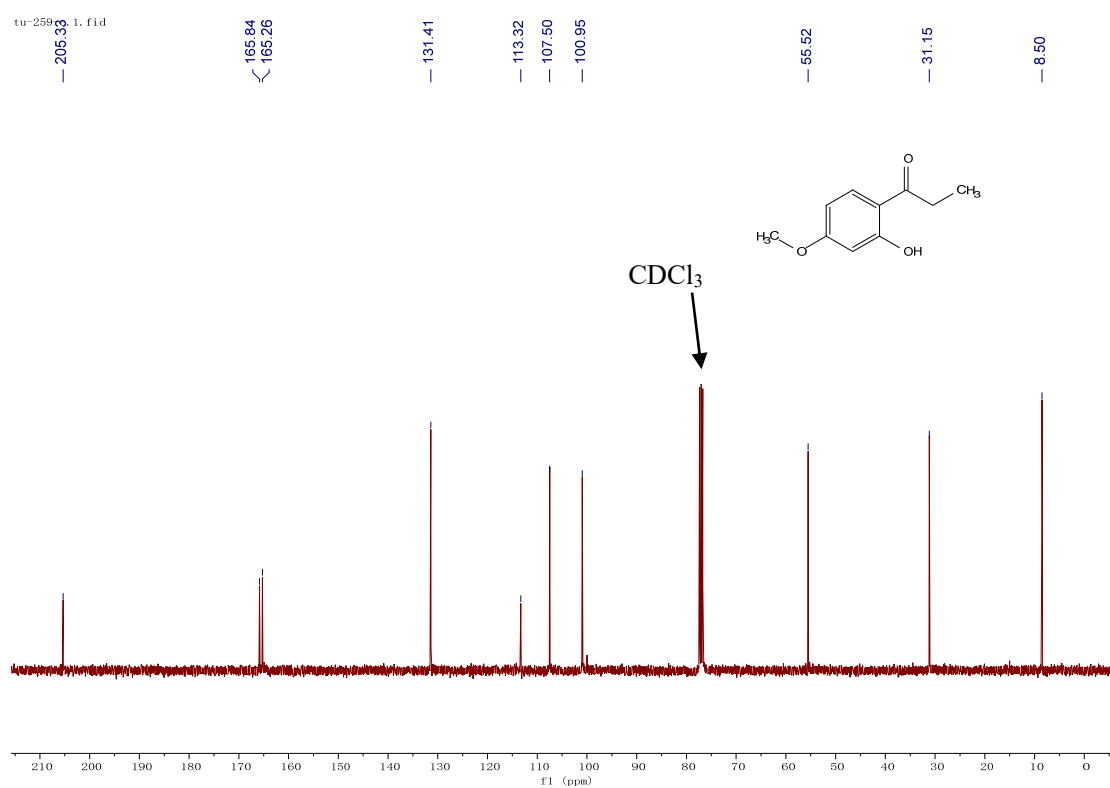

<sup>13</sup>C NMR spectrum of **3c** (100 MHz, CDCl<sub>3</sub>)

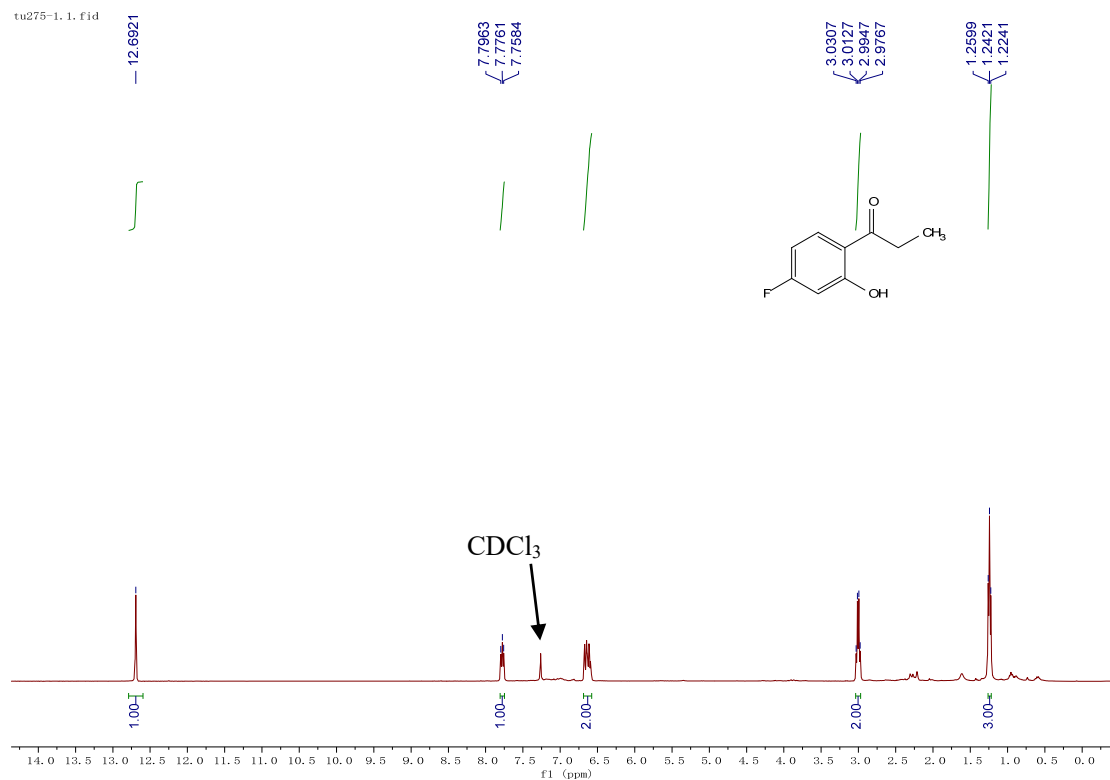

<sup>1</sup>H NMR spectrum of **3d** (400 MHz, CDCl<sub>3</sub>)

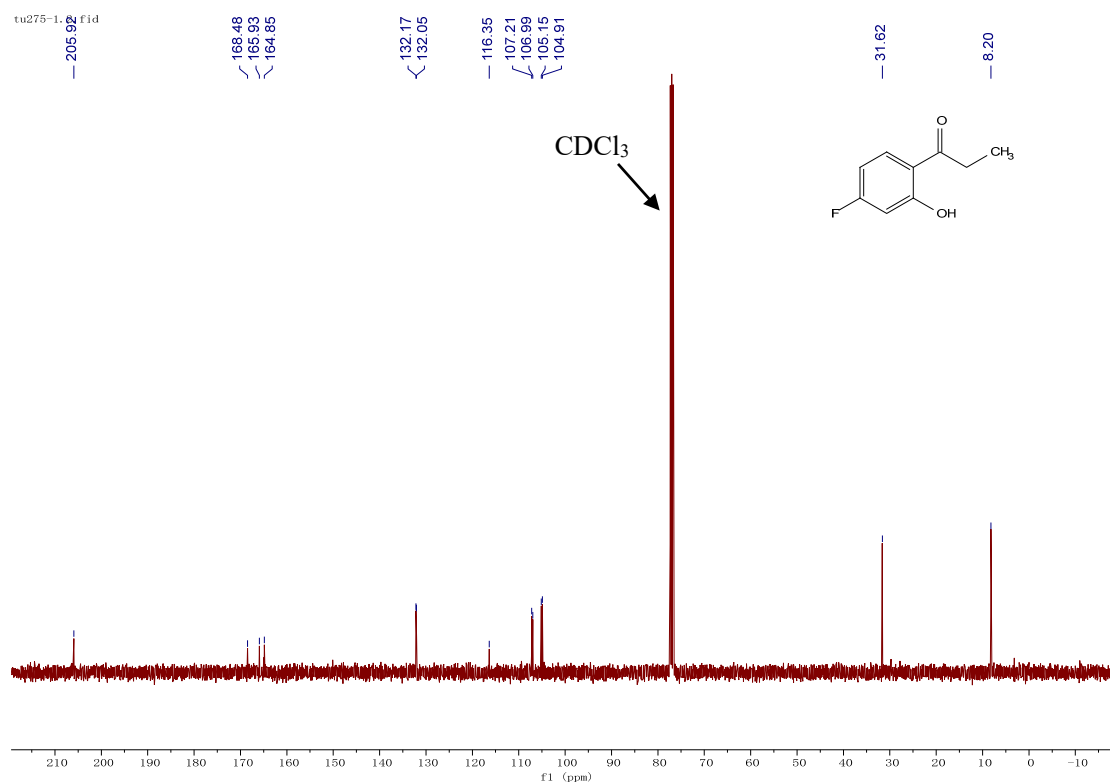

<sup>13</sup>C NMR spectrum of **3d** (100 MHz, CDCl<sub>3</sub>)

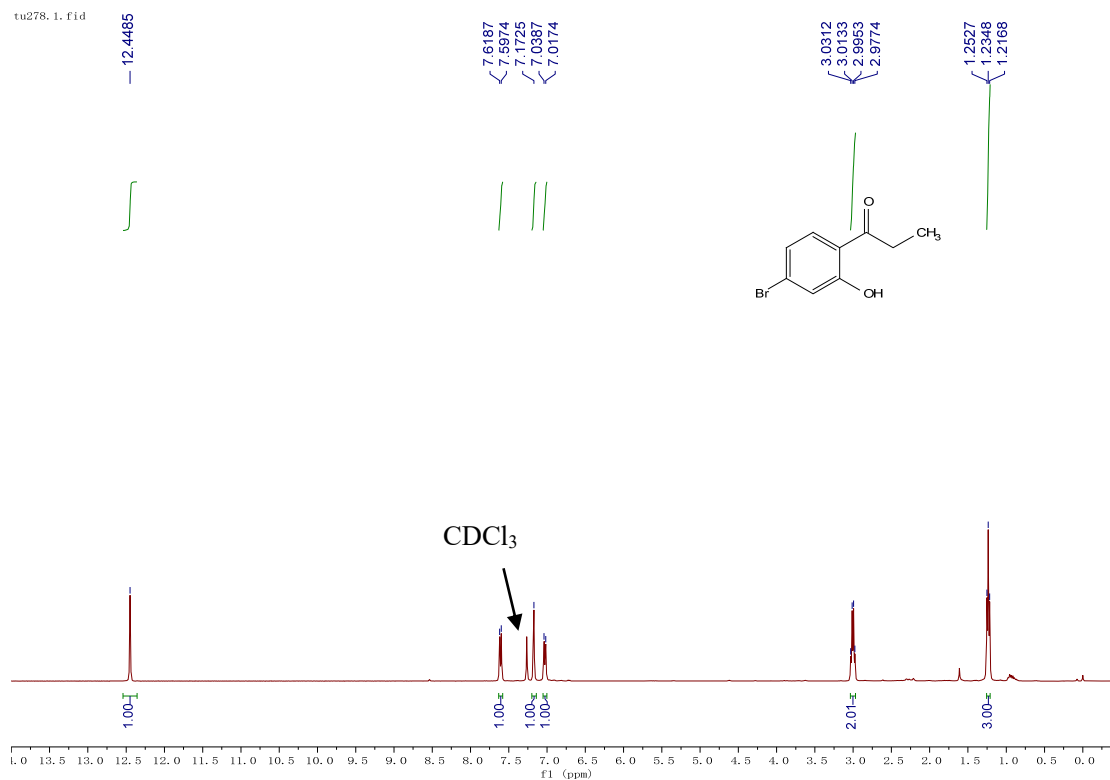

<sup>1</sup>H NMR spectrum of **3e** (400 MHz, CDCl<sub>3</sub>)

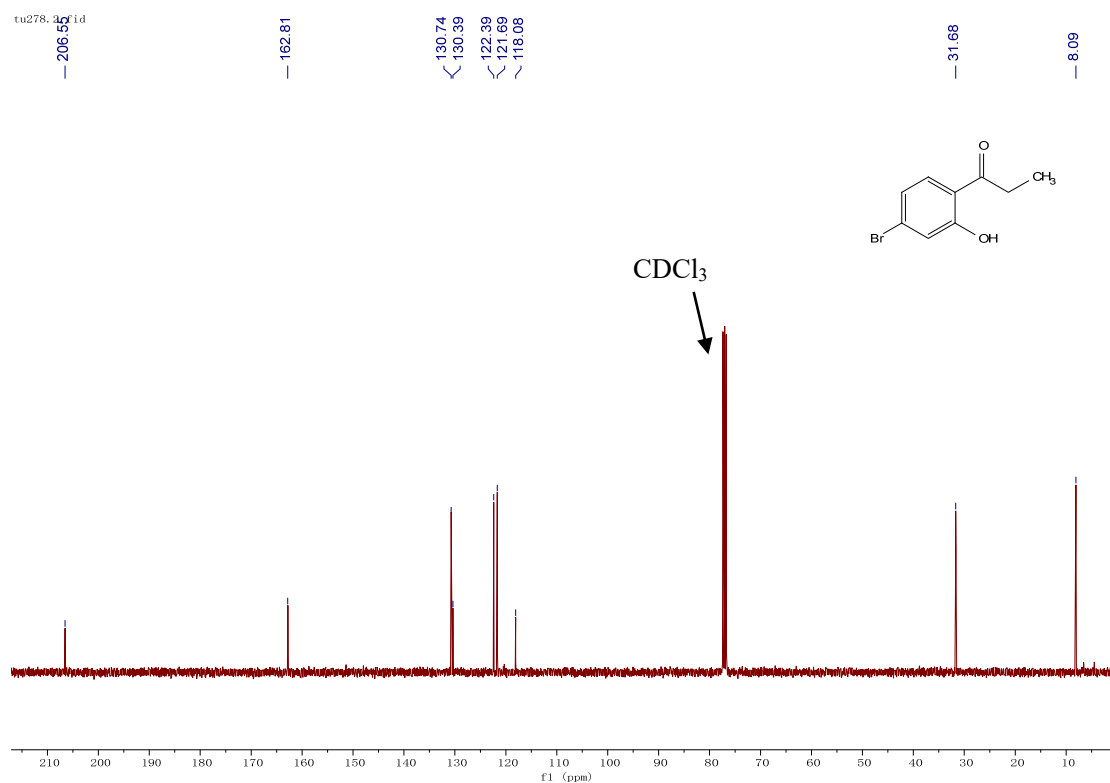

<sup>13</sup>C NMR spectrum of **3e** (100 MHz, CDCl<sub>3</sub>)

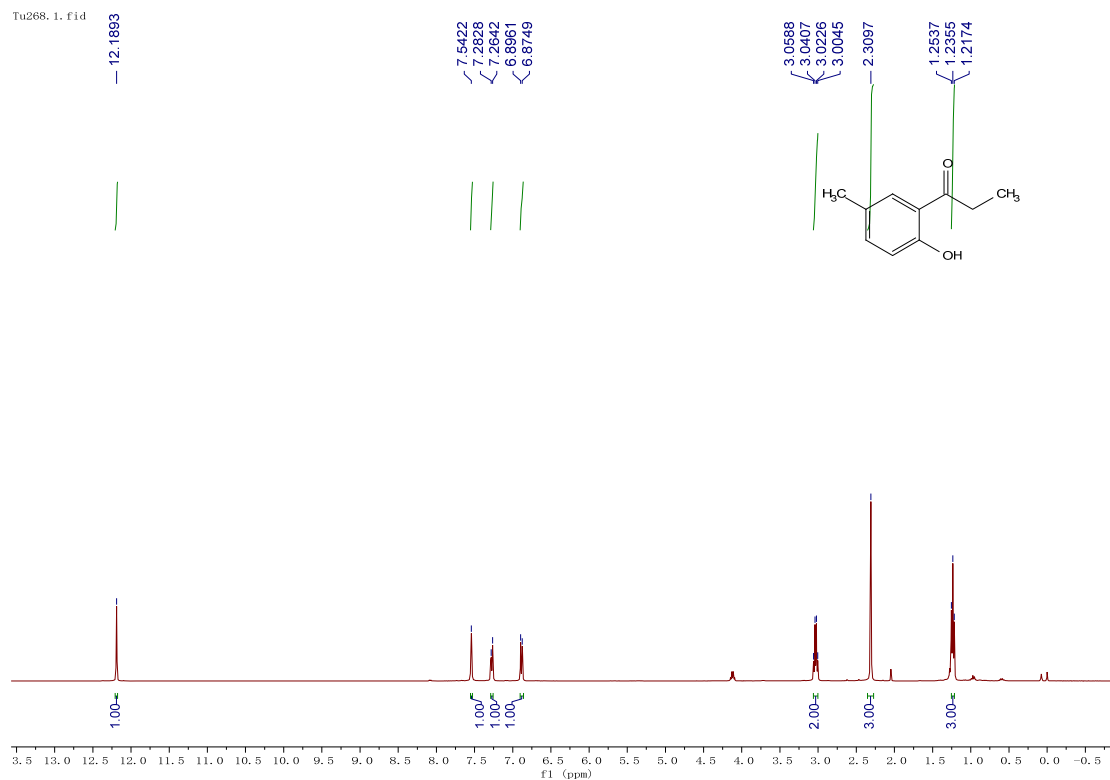

$^1\text{H}$  NMR spectrum of **3f** (400 MHz,  $\text{CDCl}_3$ )

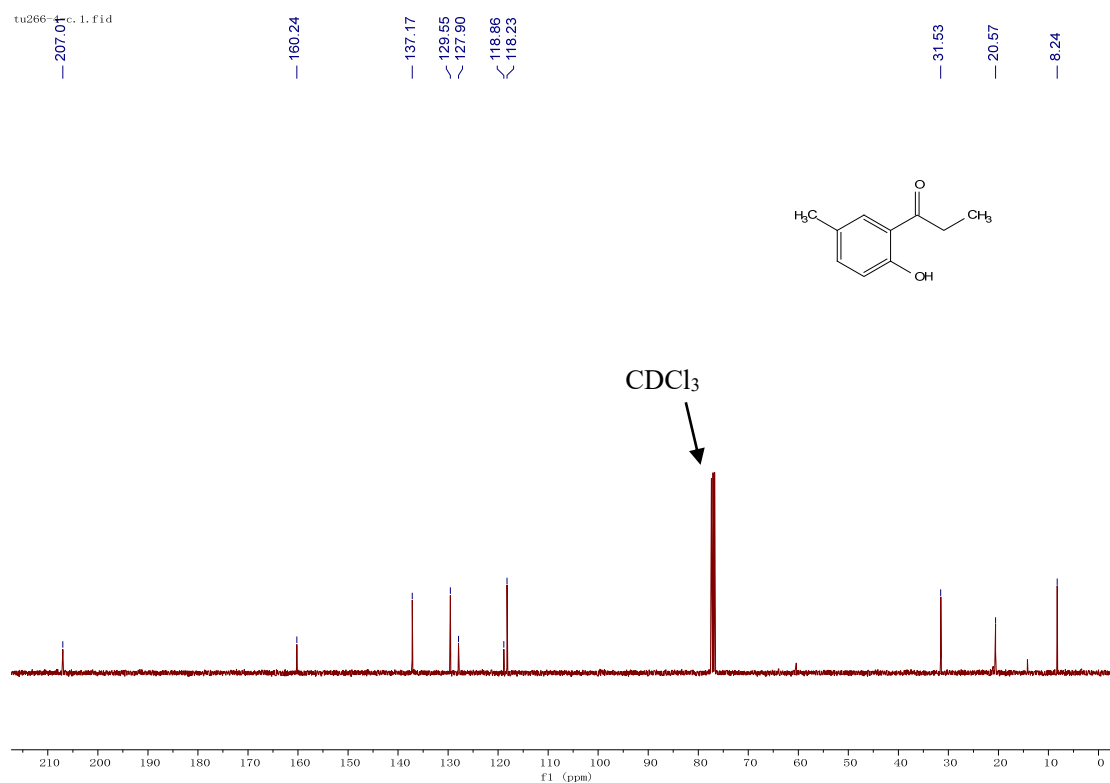

$^{13}\text{C}$  NMR spectrum of **3f** (100 MHz,  $\text{CDCl}_3$ )

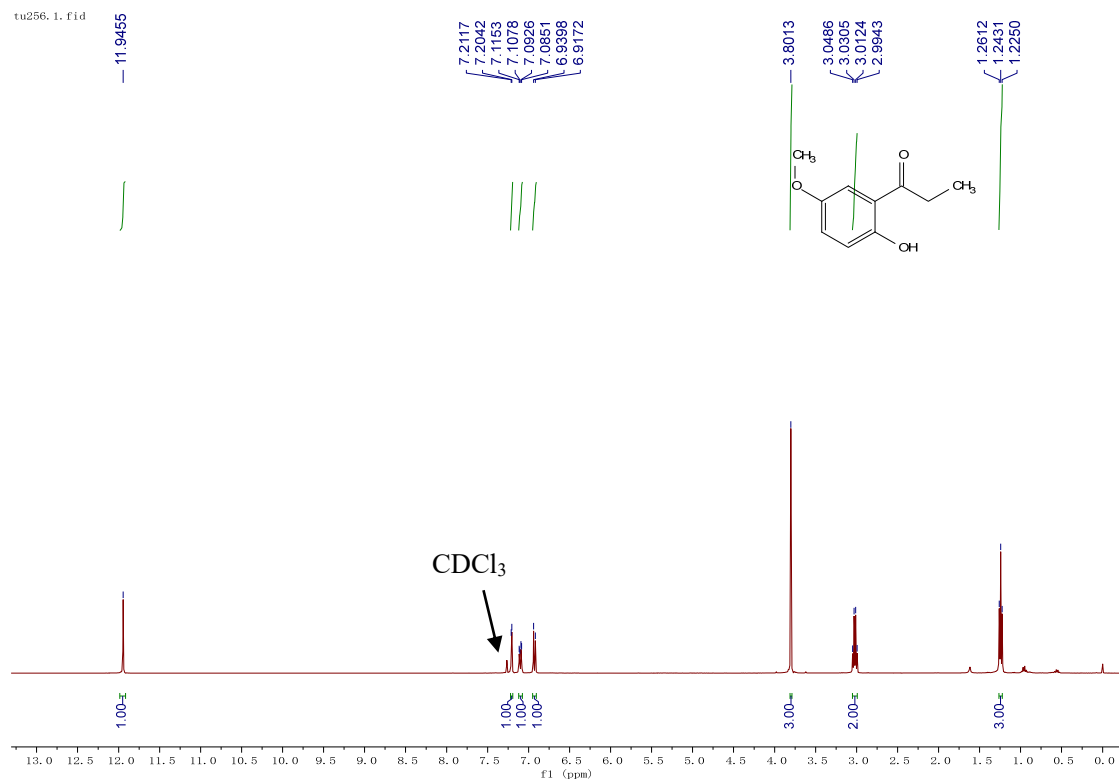

<sup>1</sup>H NMR spectrum of **3g** (400 MHz, CDCl<sub>3</sub>)

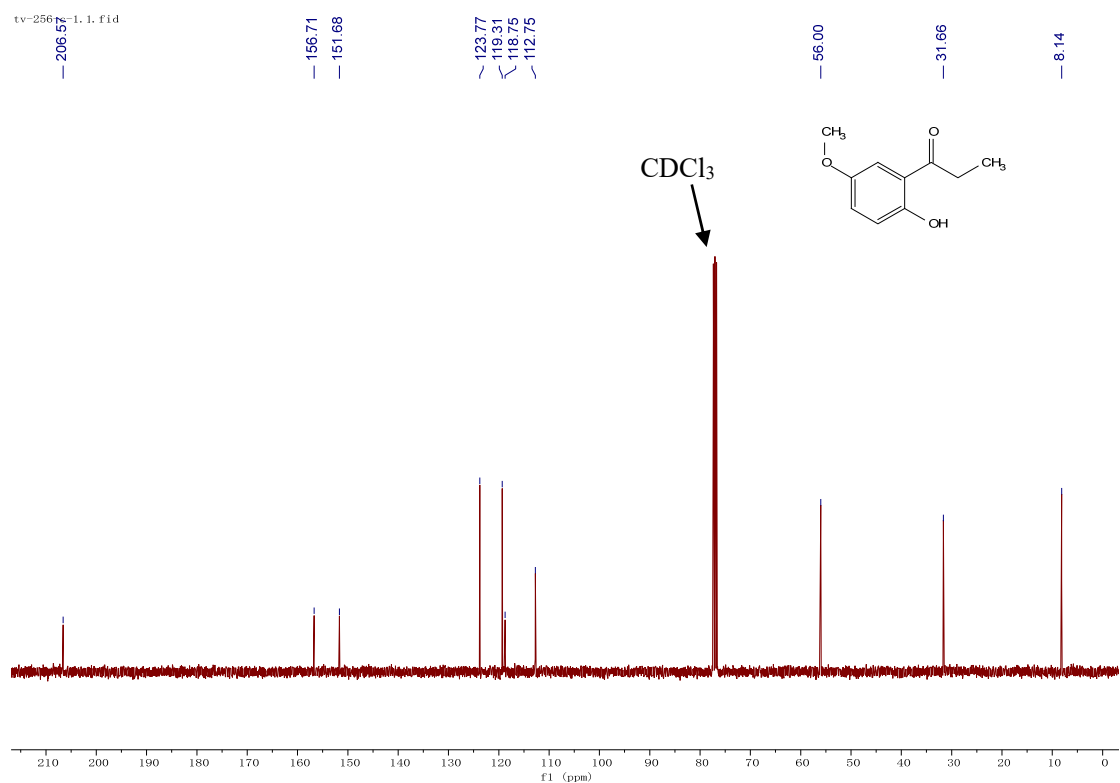

<sup>13</sup>C NMR spectrum of **3g** (100 MHz, CDCl<sub>3</sub>)



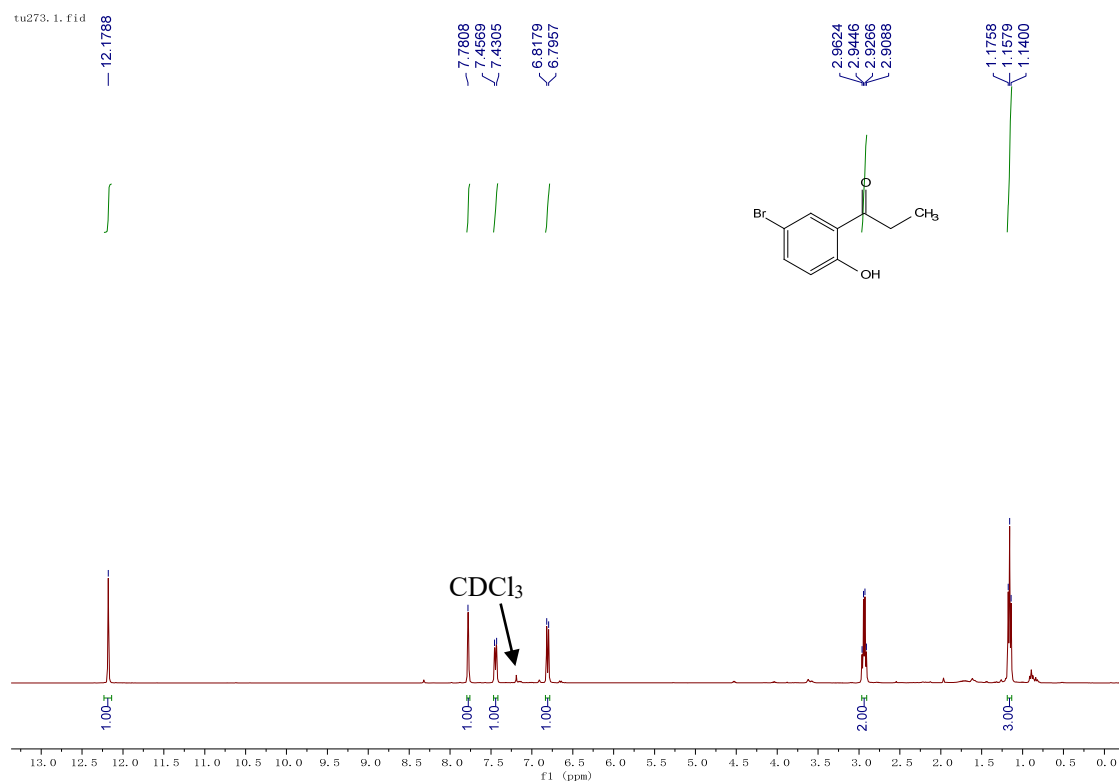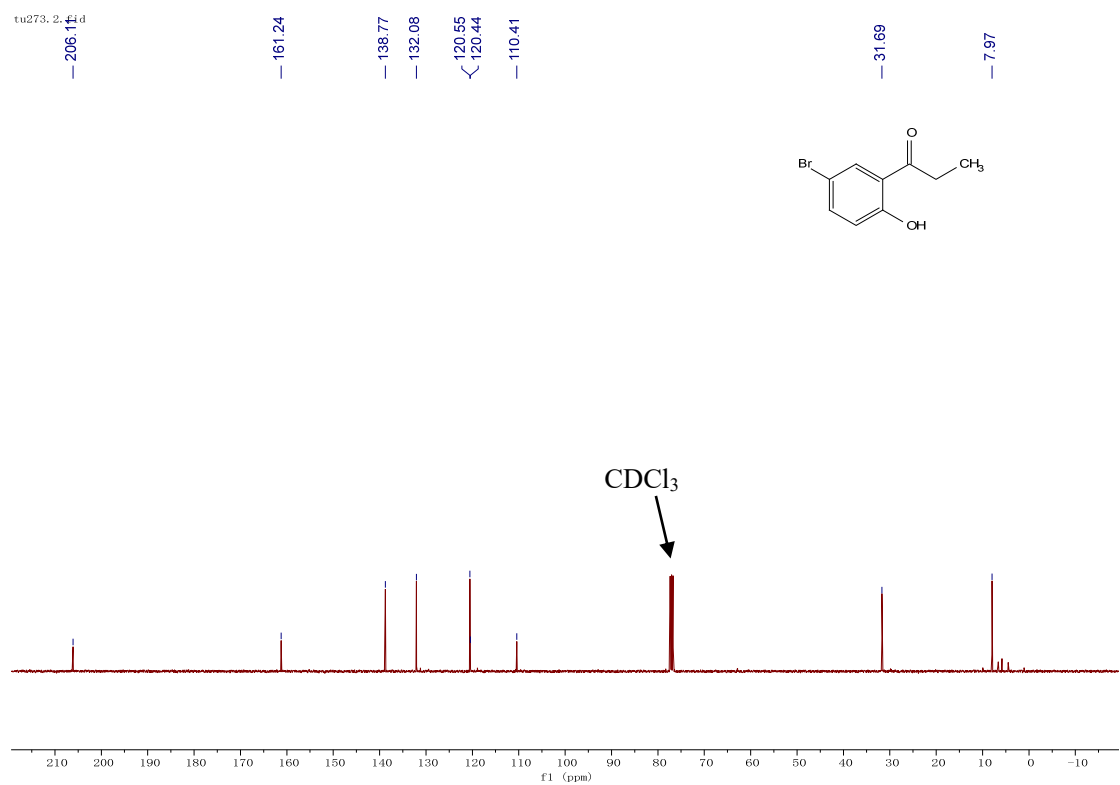

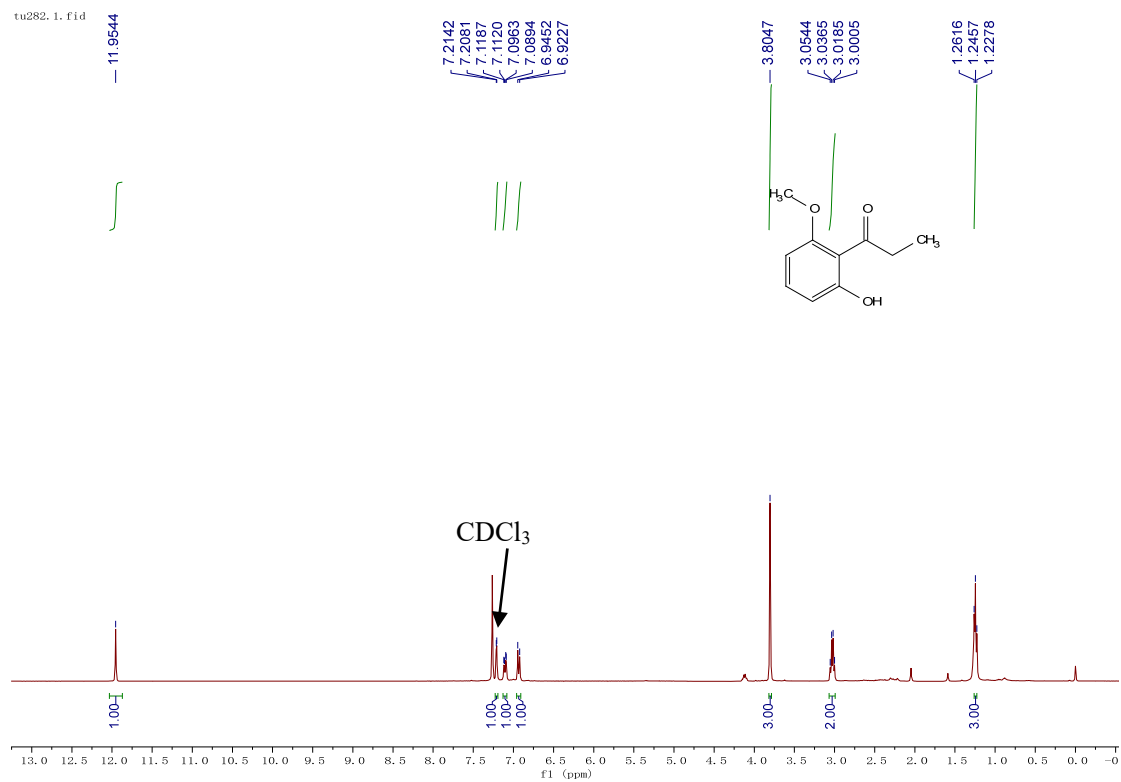

<sup>1</sup>H NMR spectrum of **3i** (400 MHz, CDCl<sub>3</sub>)

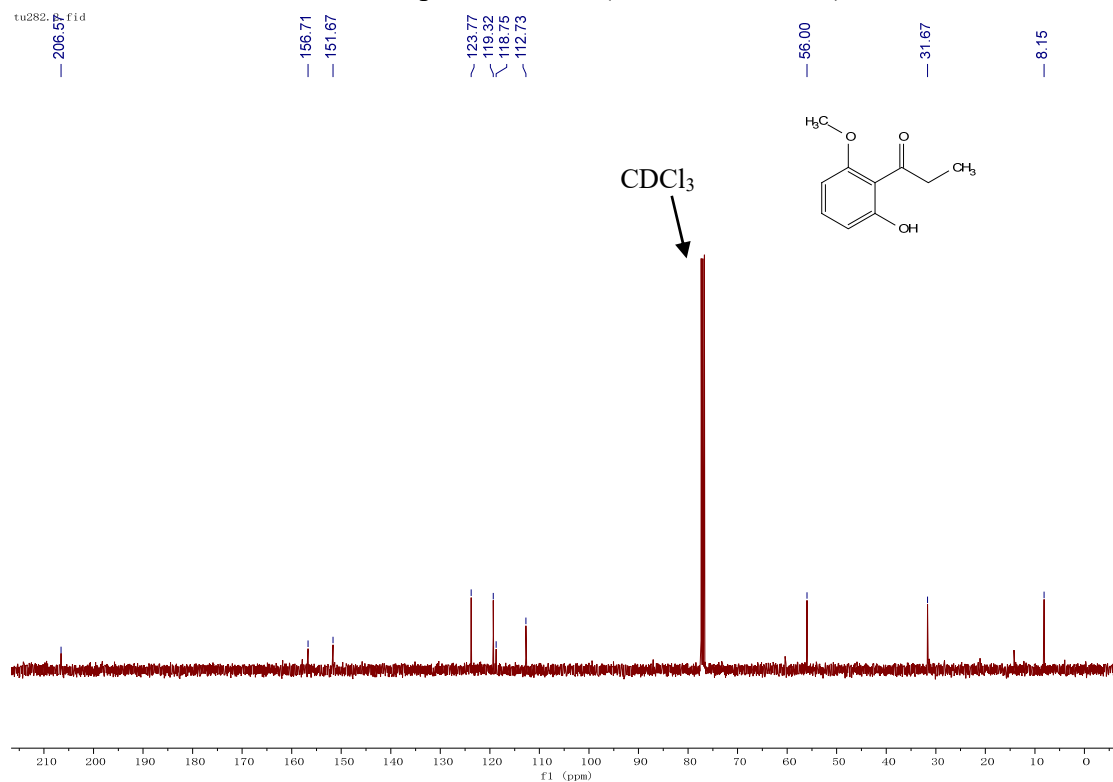

<sup>13</sup>C NMR spectrum of **3i** (100 MHz, CDCl<sub>3</sub>)

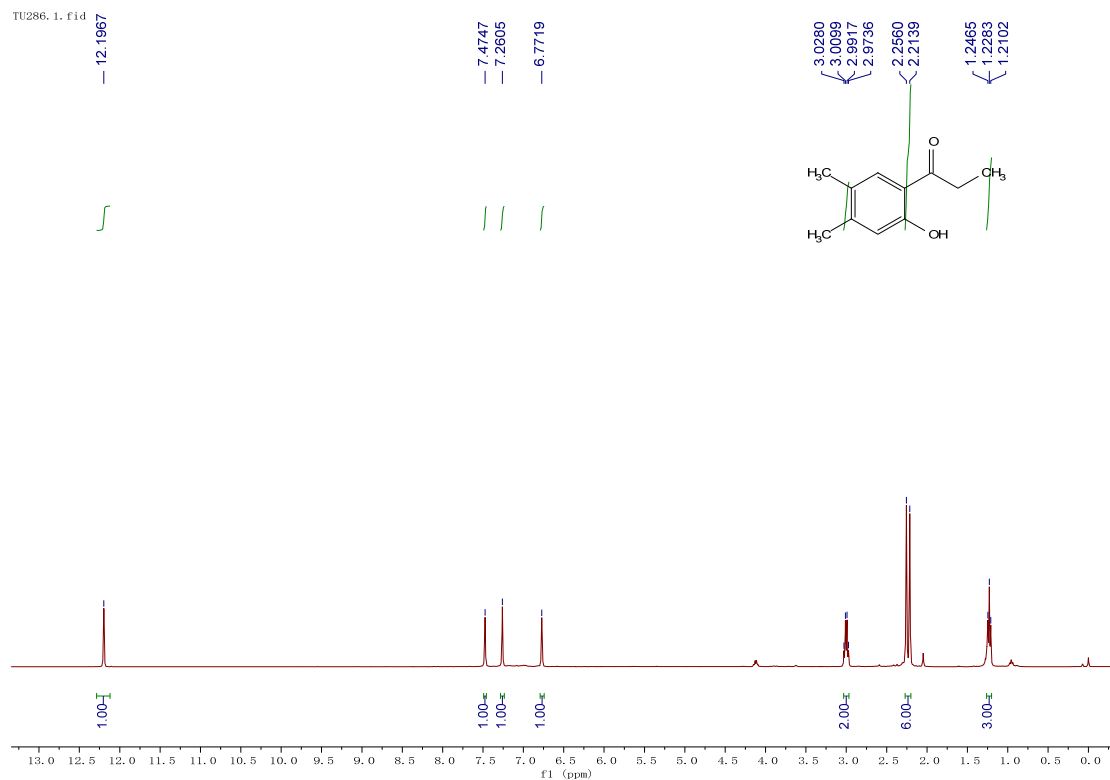

$^1\text{H}$  NMR spectrum of **3j** (400 MHz,  $\text{CDCl}_3$ )

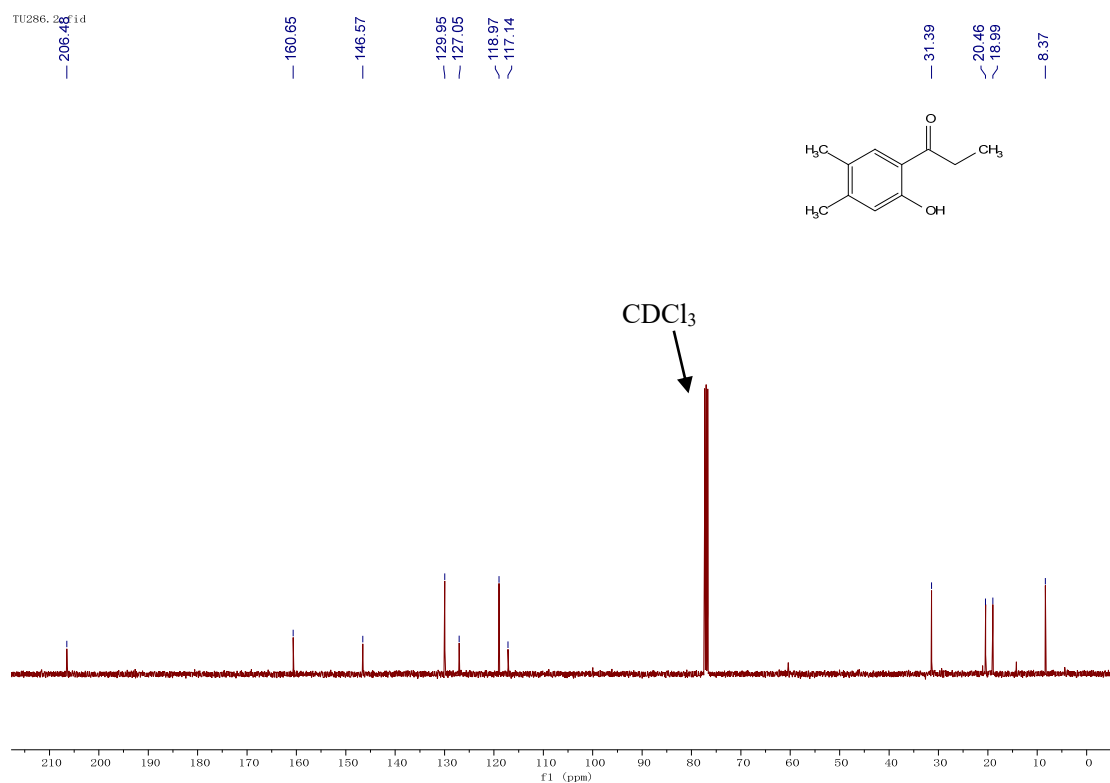

$^{13}\text{C}$  NMR spectrum of **3j** (100 MHz,  $\text{CDCl}_3$ )

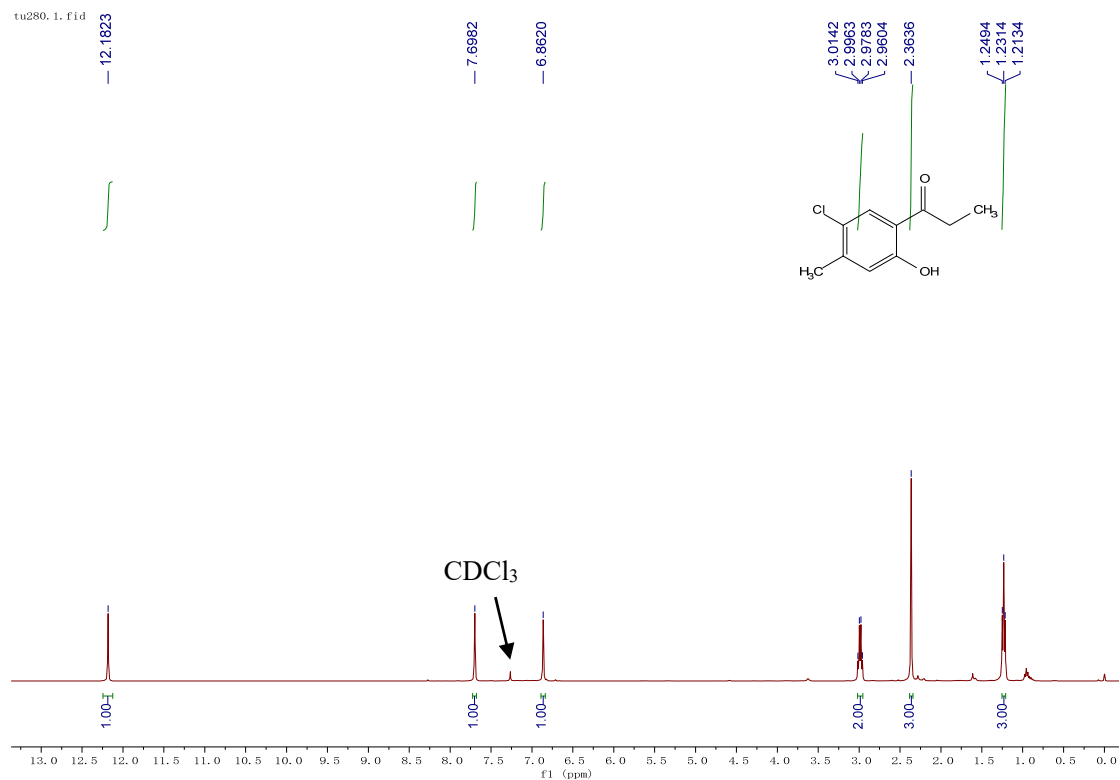

<sup>1</sup>H NMR spectrum of **3k** (400 MHz, CDCl<sub>3</sub>)

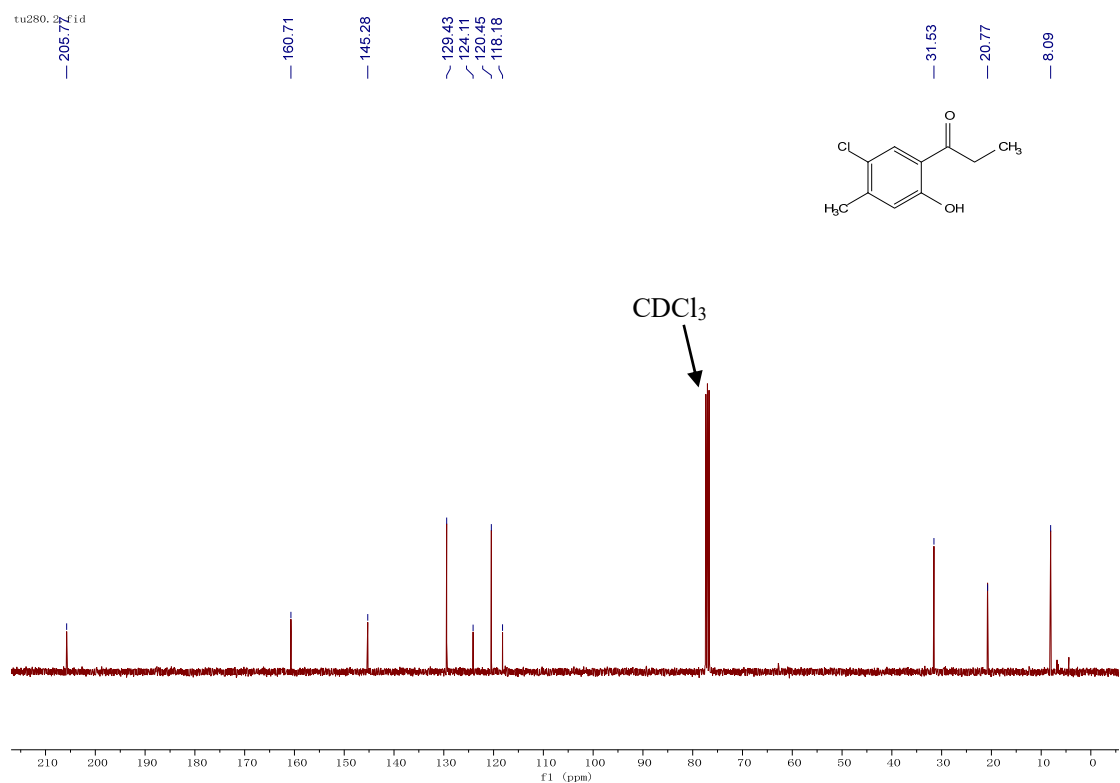

<sup>13</sup>C NMR spectrum of **3k** (100 MHz, CDCl<sub>3</sub>)

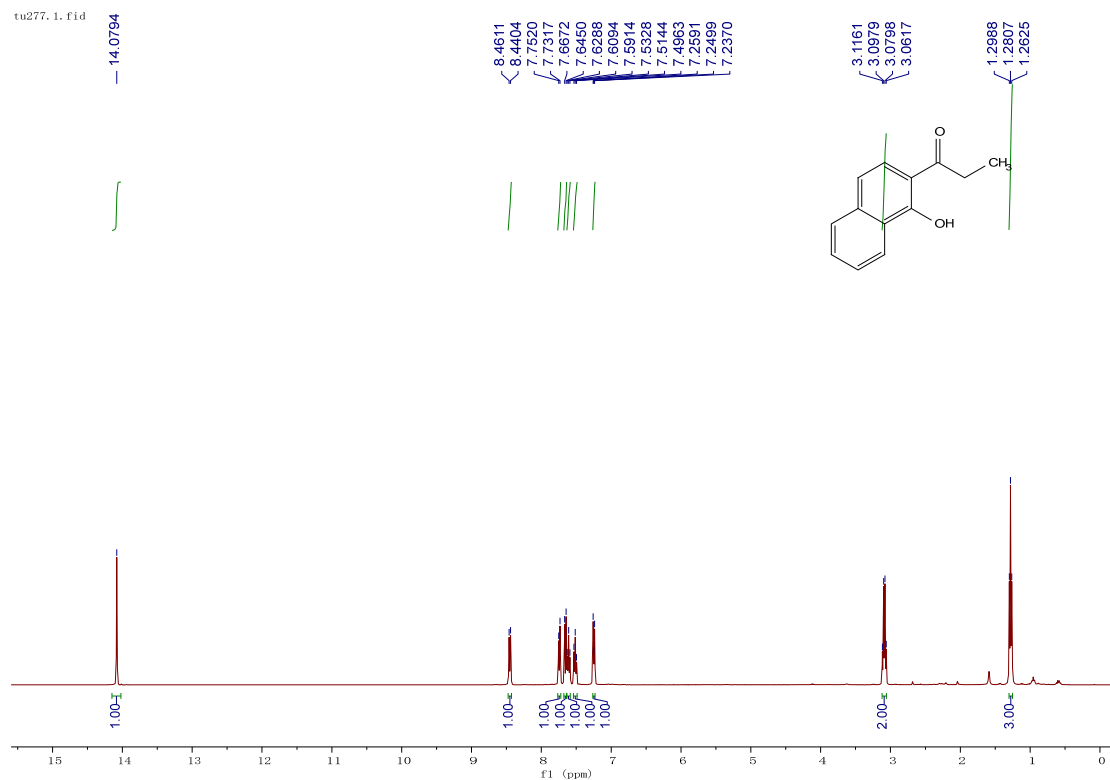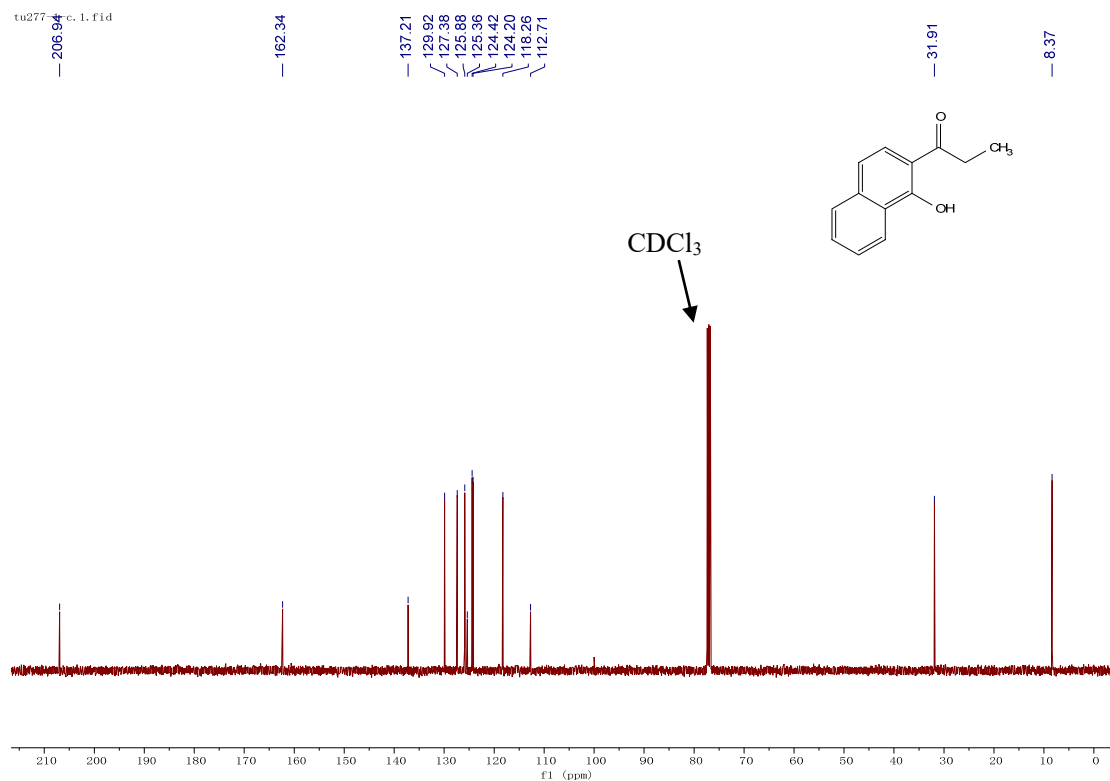

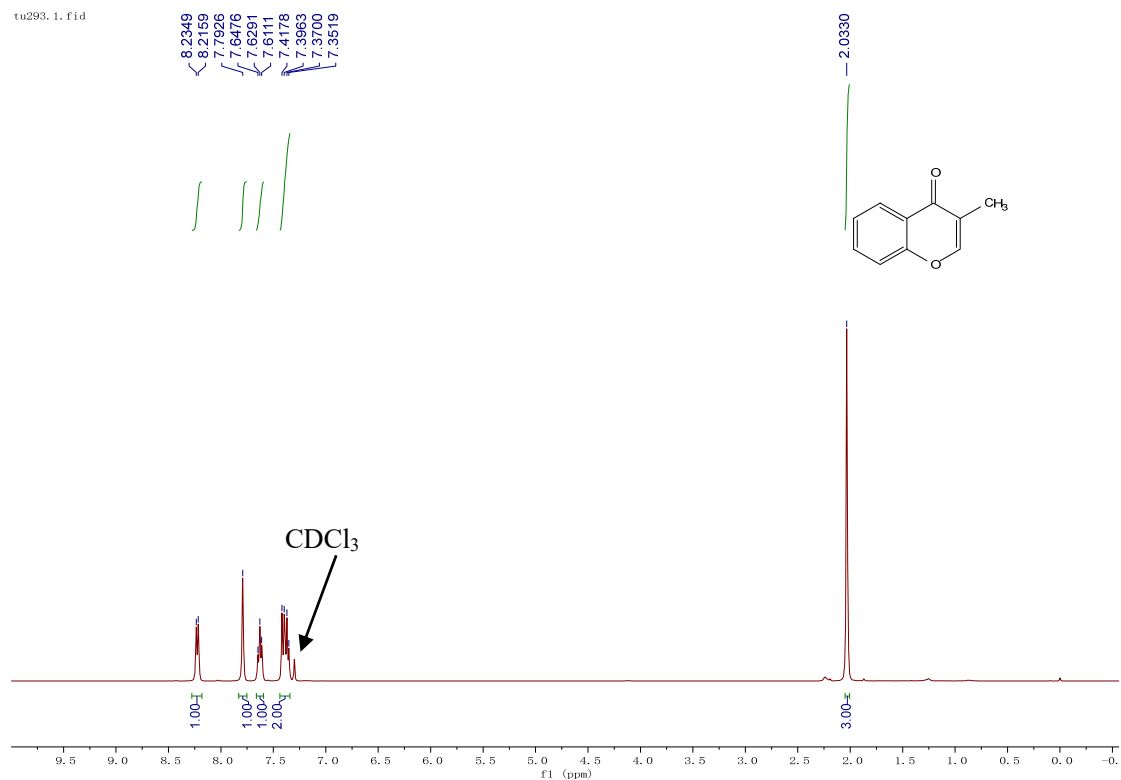

<sup>1</sup>H NMR spectrum of **4a** (400 MHz, CDCl<sub>3</sub>)

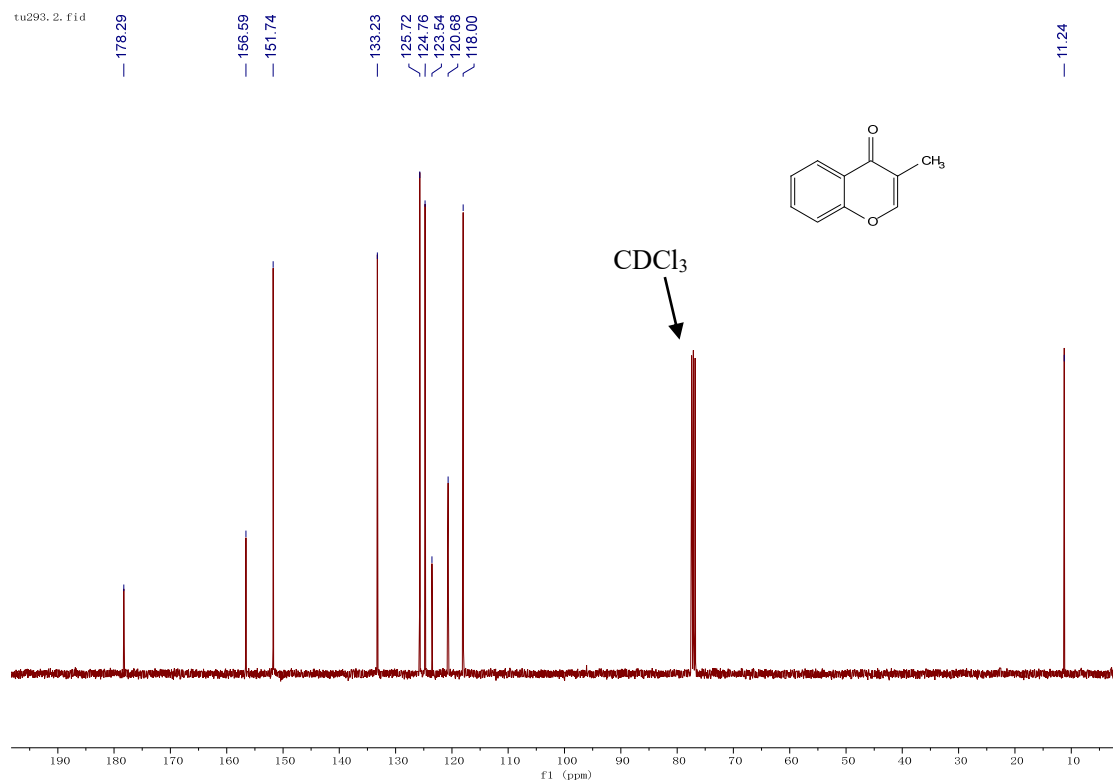

<sup>13</sup>C NMR spectrum of **4a** (100 MHz, CDCl<sub>3</sub>)

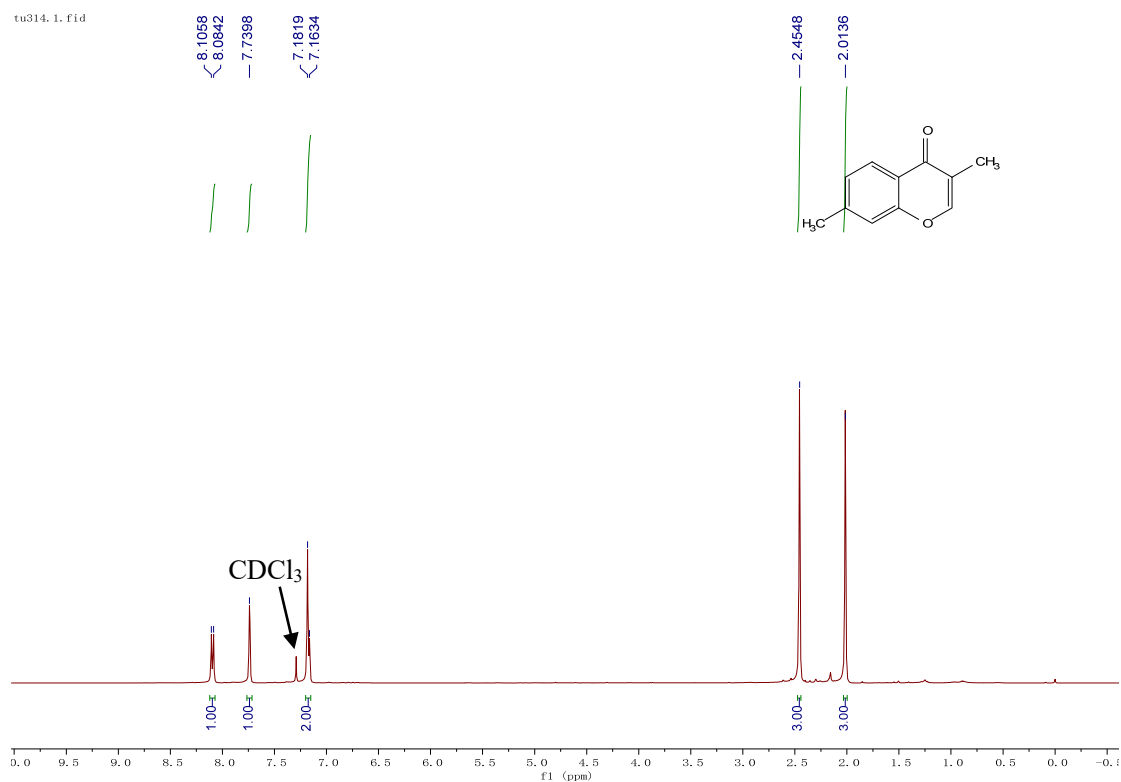

<sup>1</sup>H NMR spectrum of **4b** (400 MHz, CDCl<sub>3</sub>)

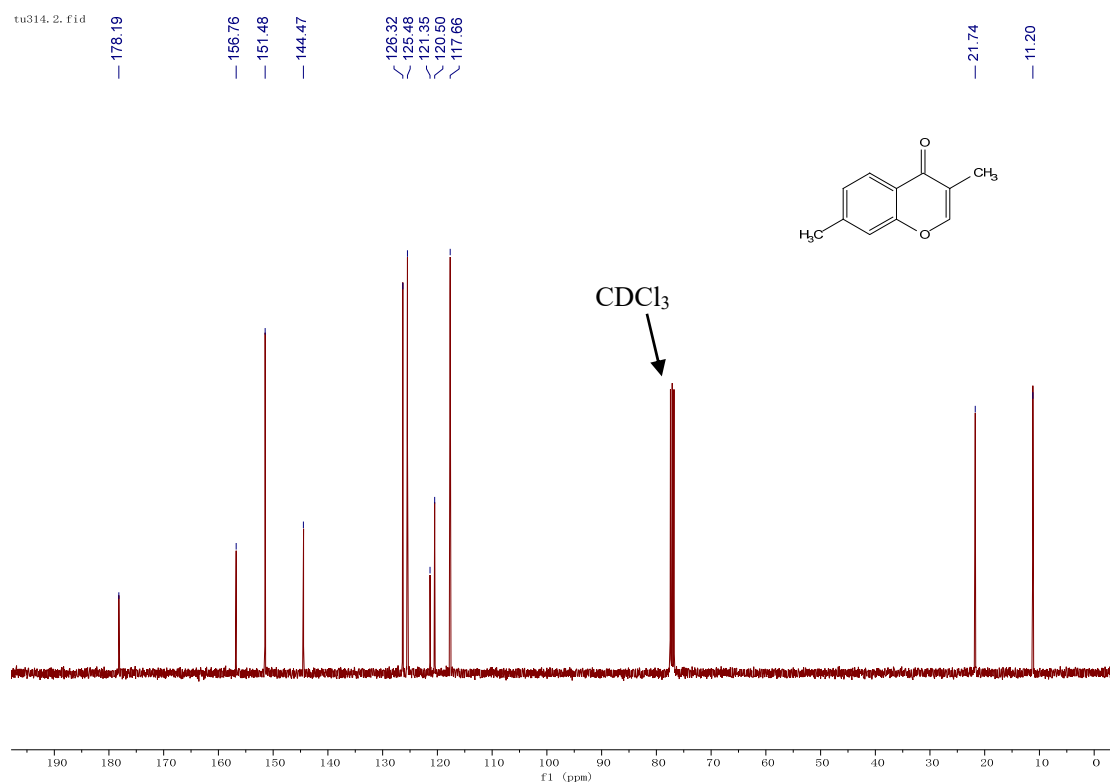

<sup>13</sup>C NMR spectrum of **4b** (100 MHz, CDCl<sub>3</sub>)

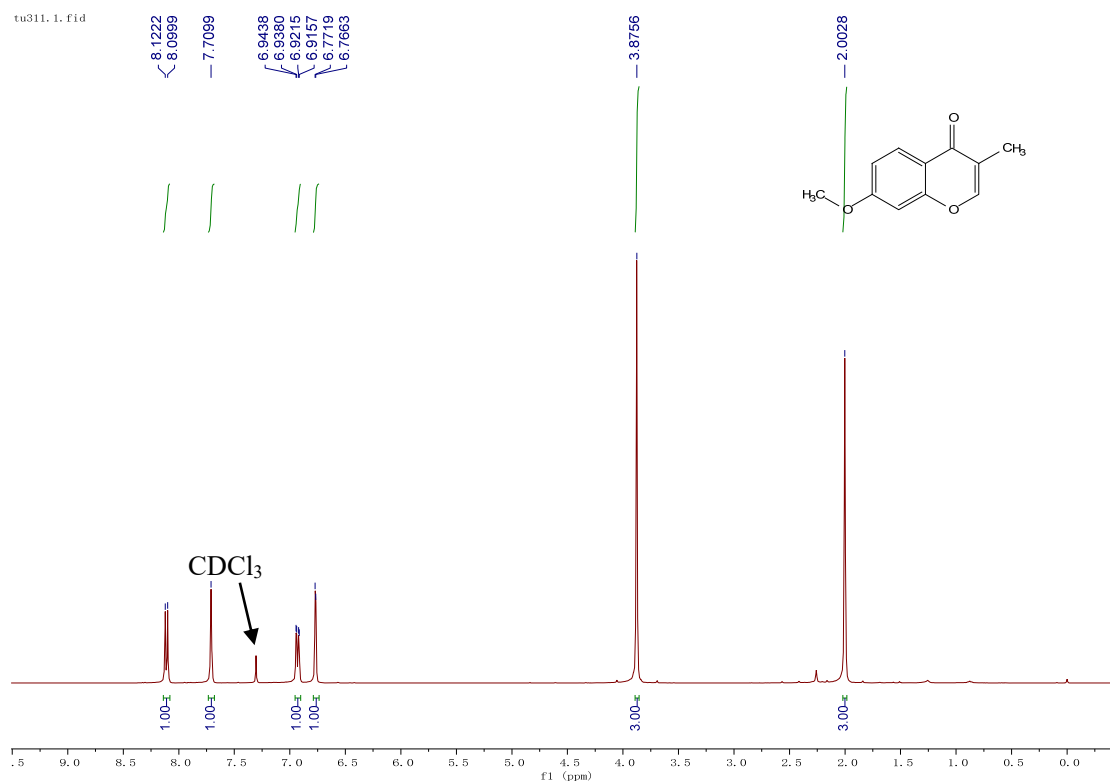

<sup>1</sup>H NMR spectrum of **4c** (400 MHz, CDCl<sub>3</sub>)

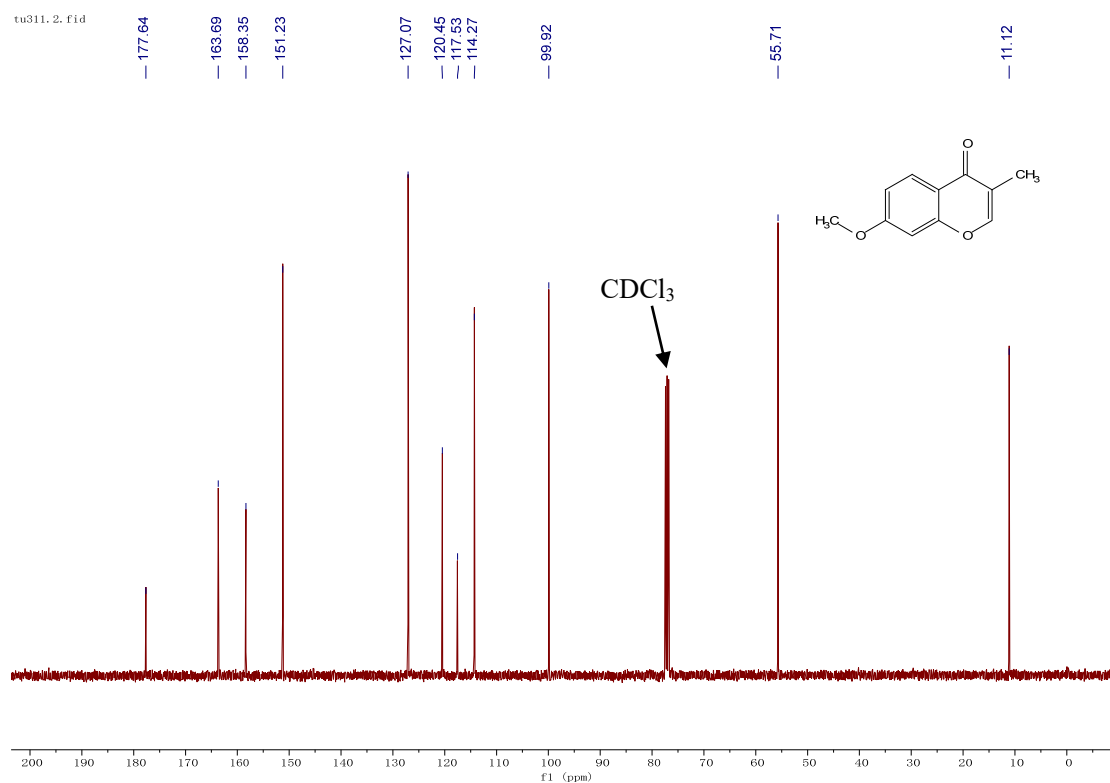

<sup>13</sup>C NMR spectrum of **4c** (100 MHz, CDCl<sub>3</sub>)



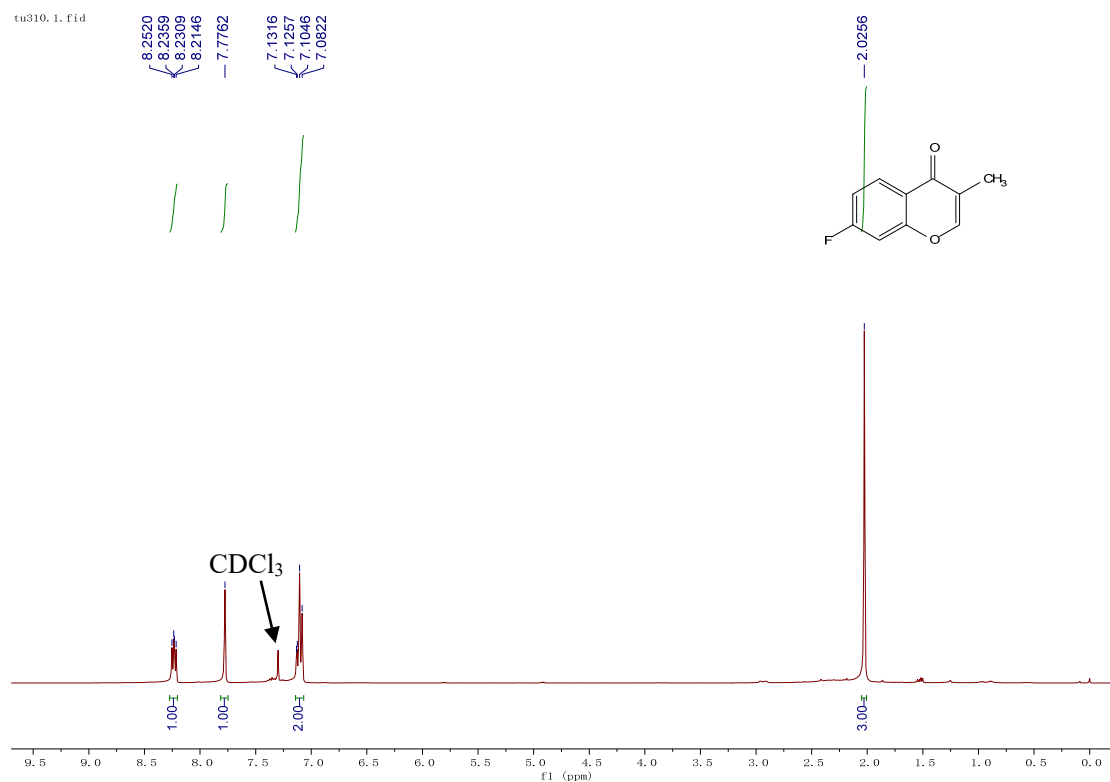

<sup>1</sup>H NMR spectrum of **4d** (400 MHz, CDCl<sub>3</sub>)

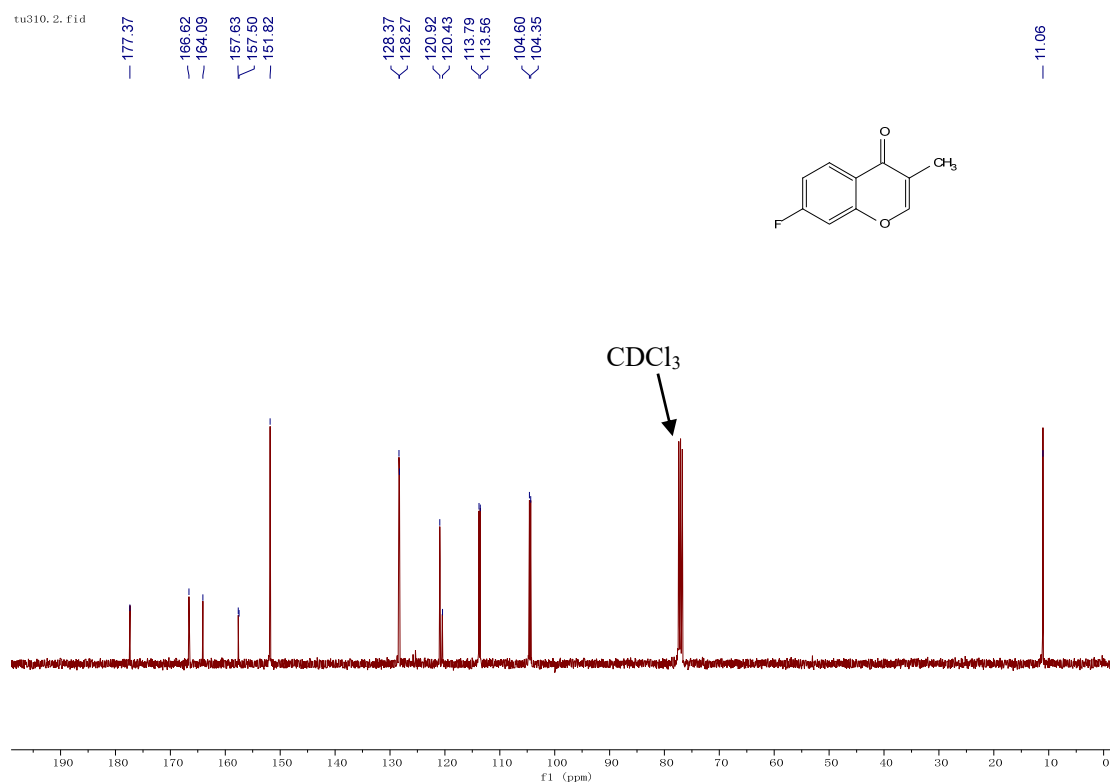

<sup>13</sup>C NMR spectrum of **4d** (100 MHz, CDCl<sub>3</sub>)

tu303.1.fid

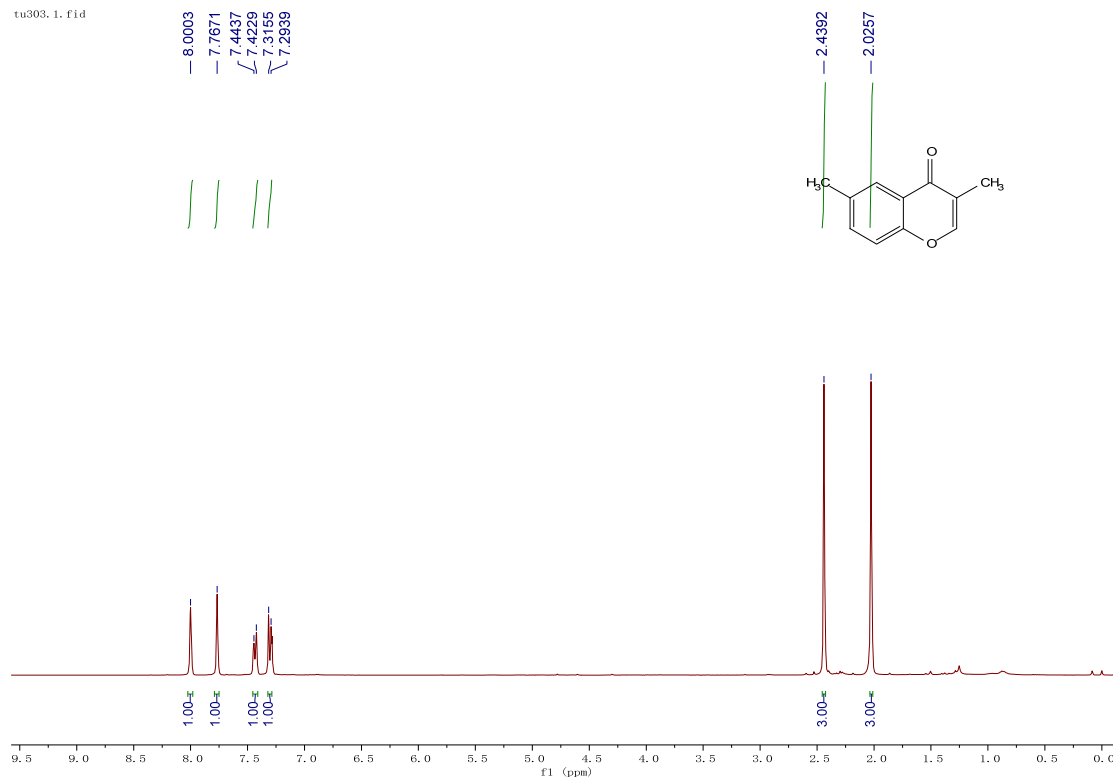

$^1\text{H}$  NMR spectrum of **4e** (400 MHz,  $\text{CDCl}_3$ )

tu303.2.fid

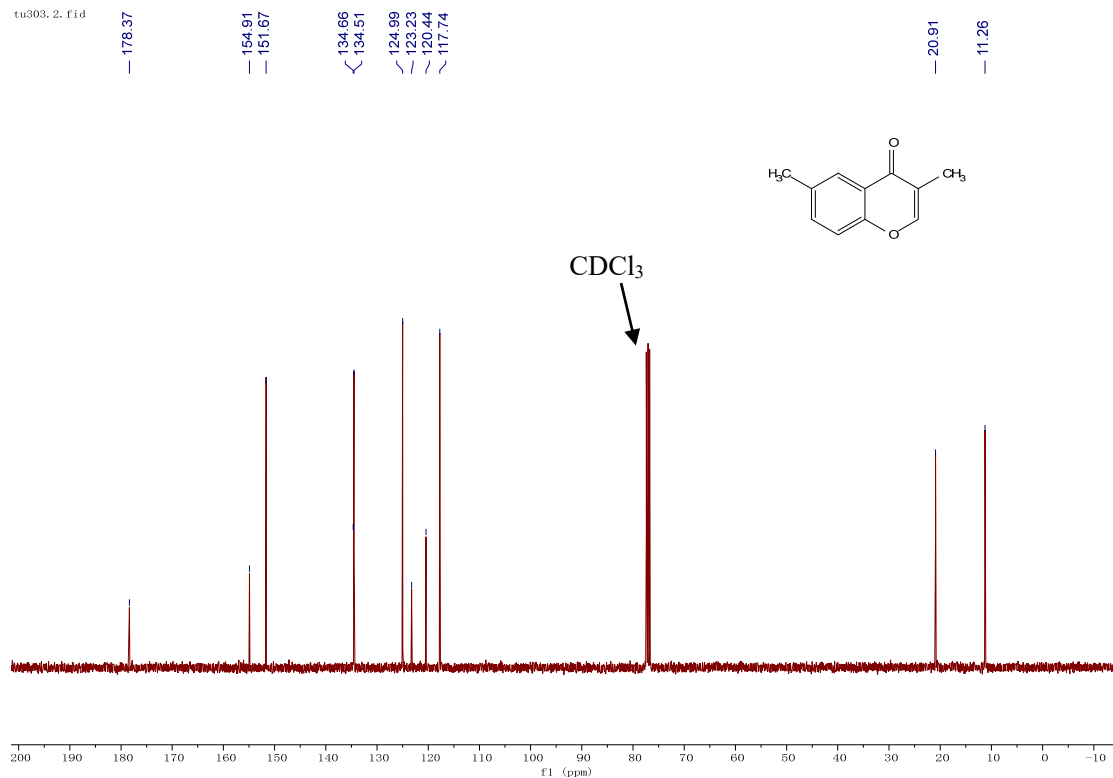

$^{13}\text{C}$  NMR spectrum of **4e** (100 MHz,  $\text{CDCl}_3$ )

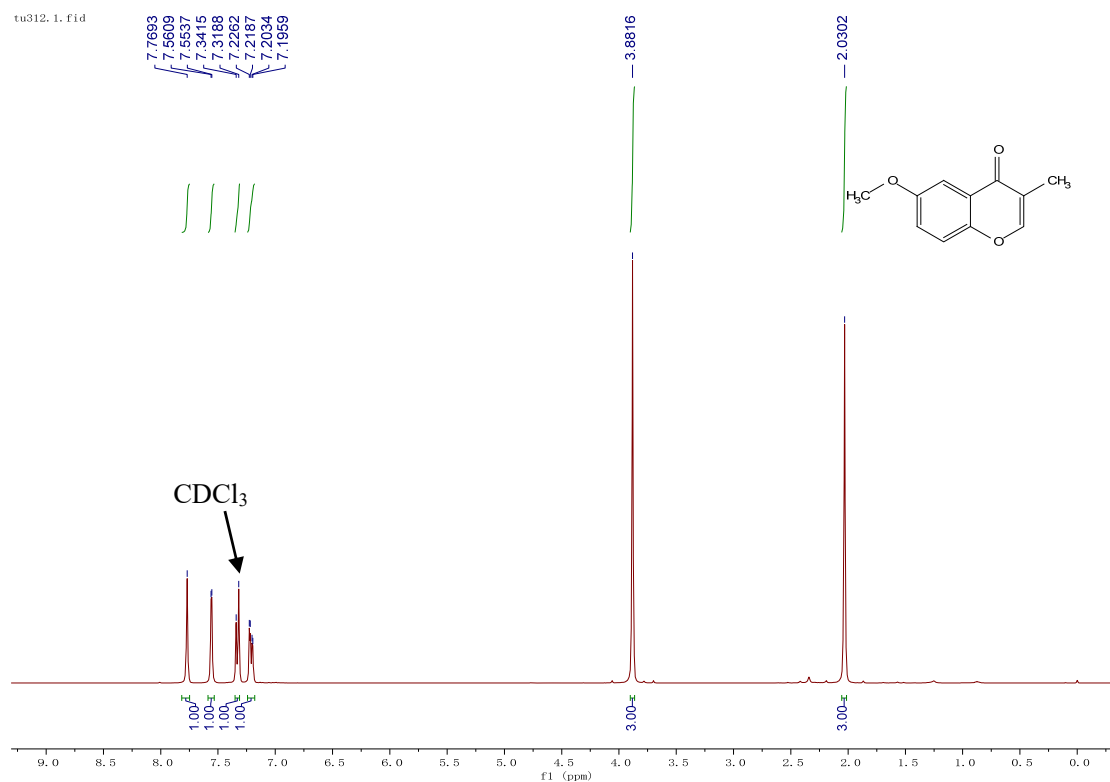

<sup>1</sup>H NMR spectrum of **4f** (400 MHz, CDCl<sub>3</sub>)

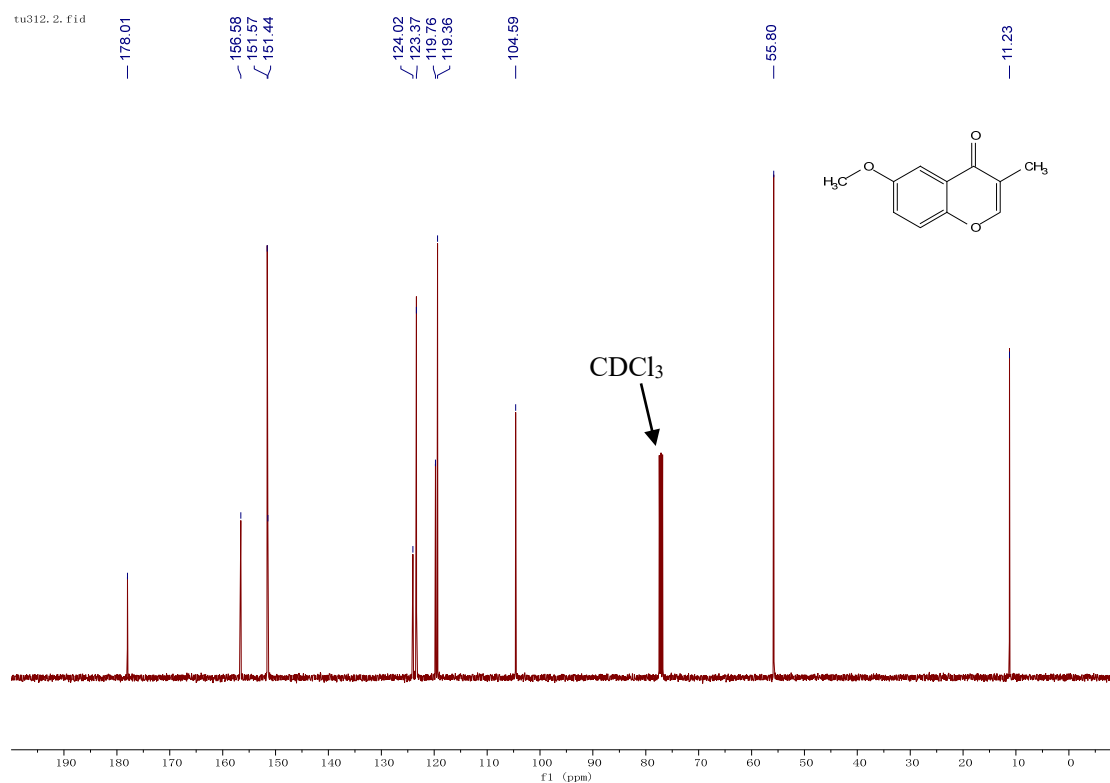

<sup>13</sup>C NMR spectrum of **4f** (100 MHz, CDCl<sub>3</sub>)

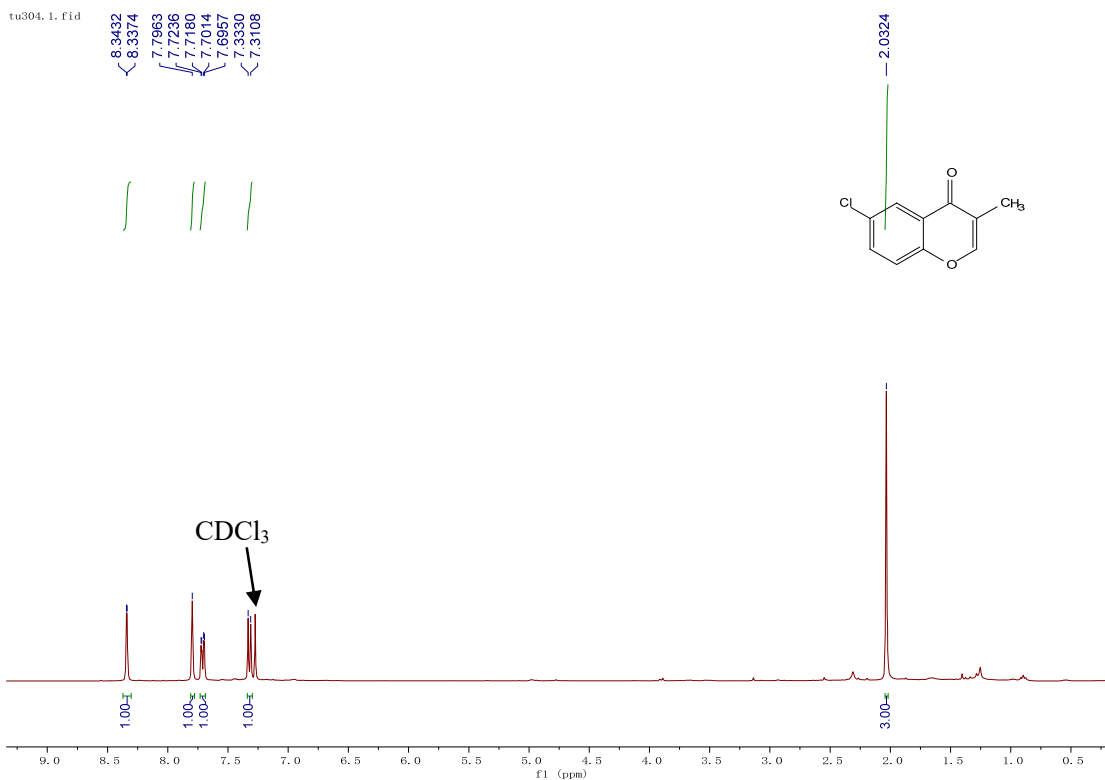

<sup>1</sup>H NMR spectrum of **4g** (400 MHz, CDCl<sub>3</sub>)

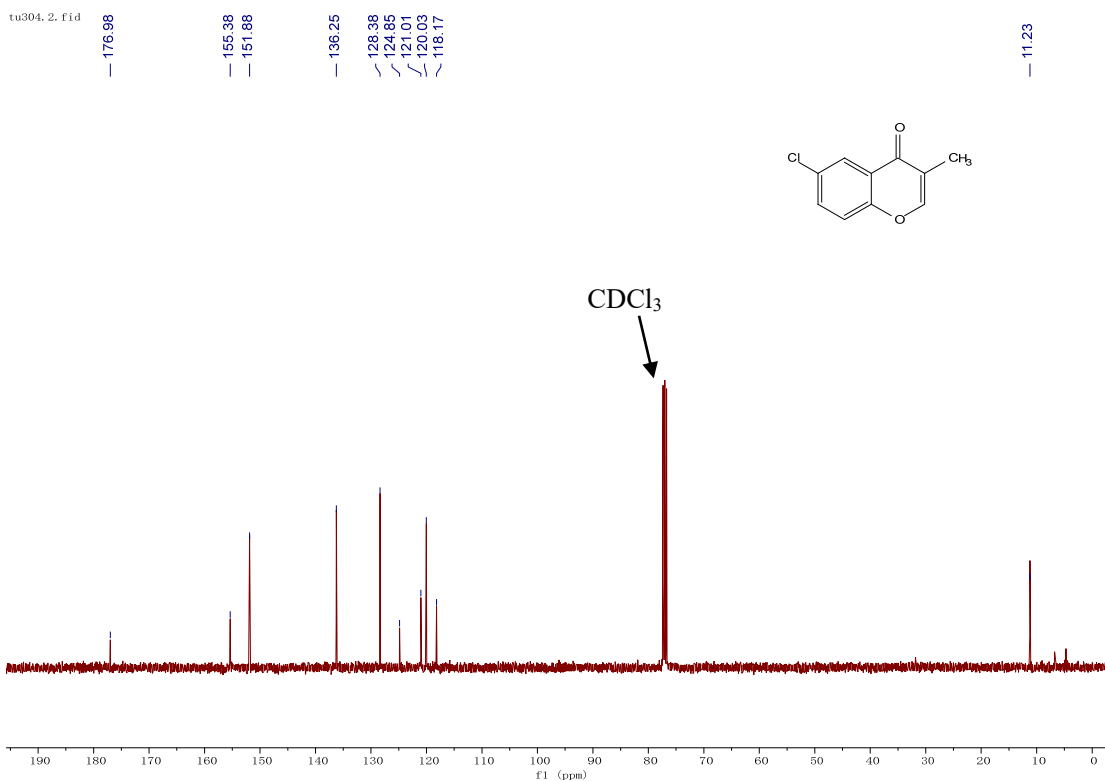

<sup>13</sup>C NMR spectrum of **4g** (100 MHz, CDCl<sub>3</sub>)

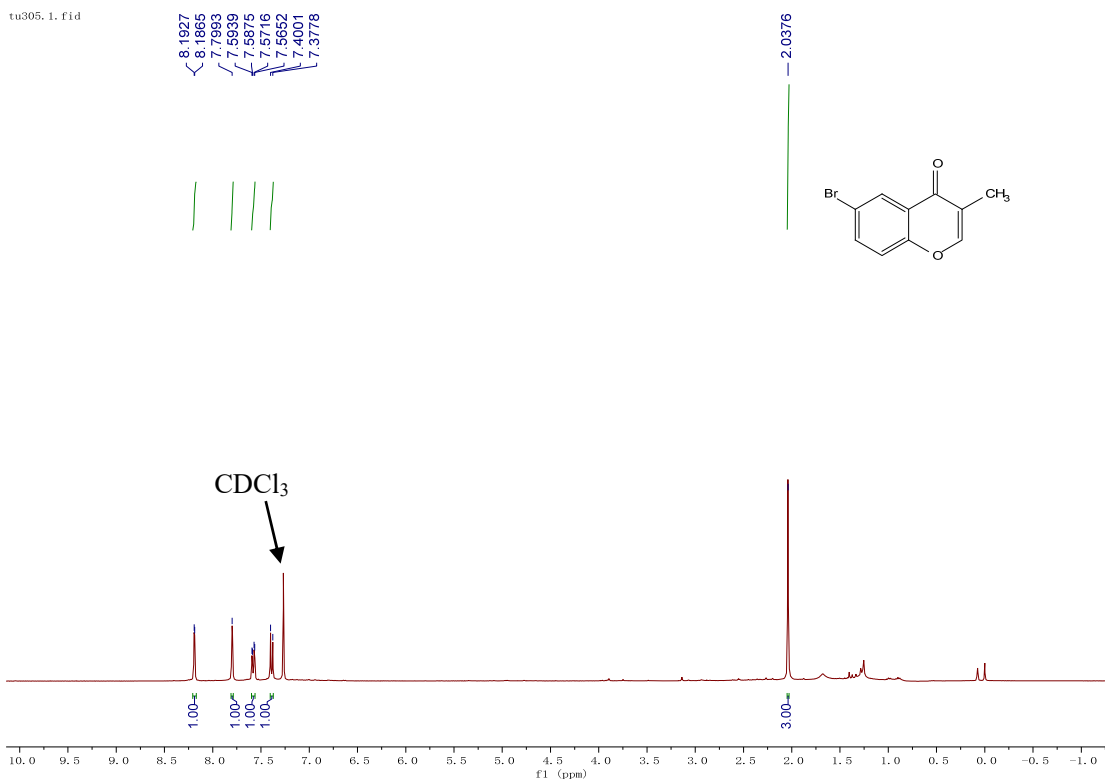

<sup>1</sup>H NMR spectrum of **4h** (400 MHz, CDCl<sub>3</sub>)

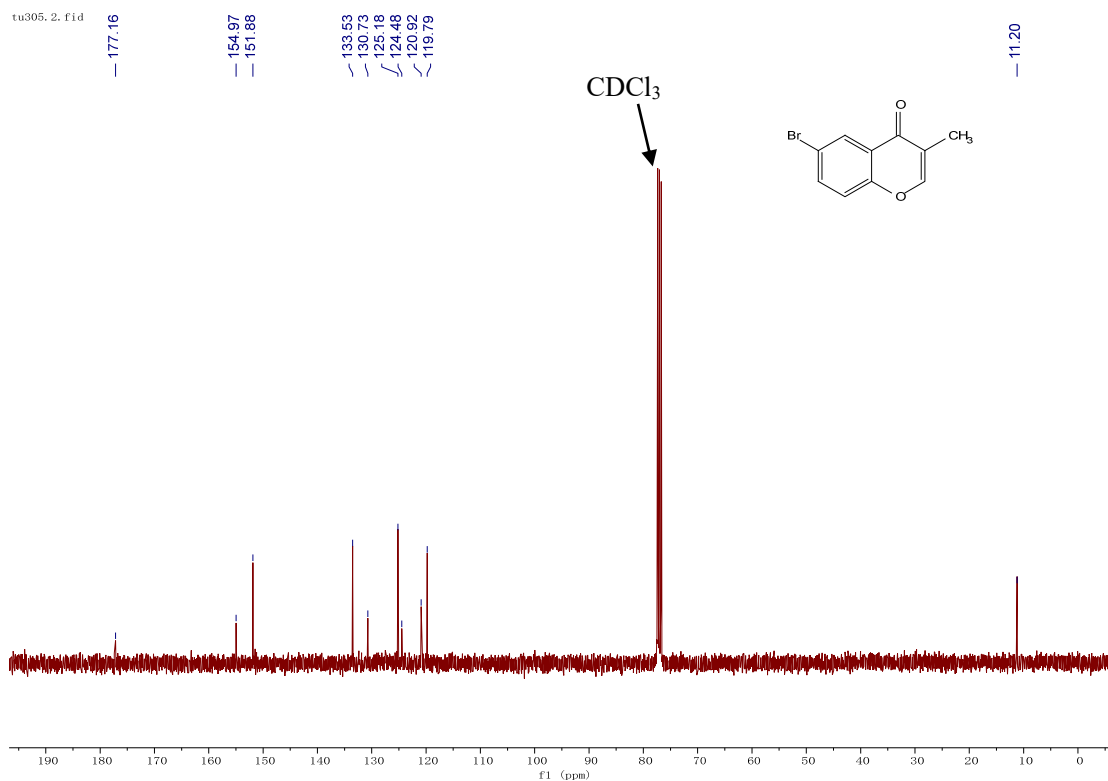

<sup>13</sup>C NMR spectrum of **4h** (100 MHz, CDCl<sub>3</sub>)

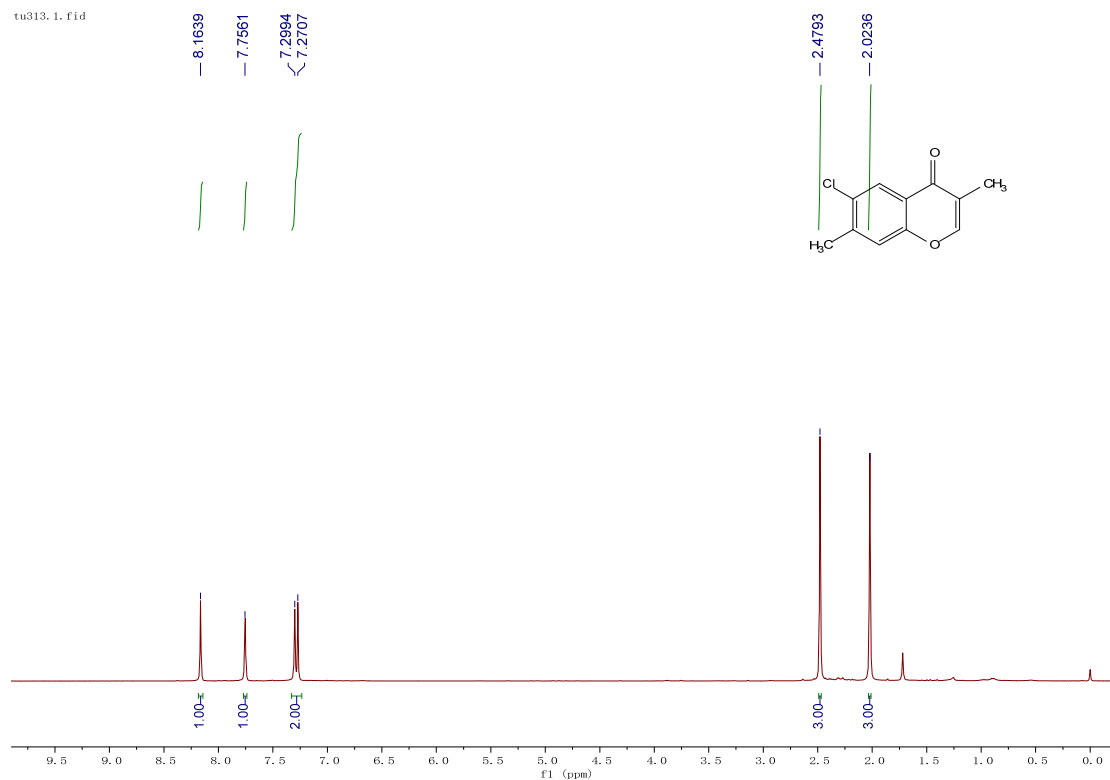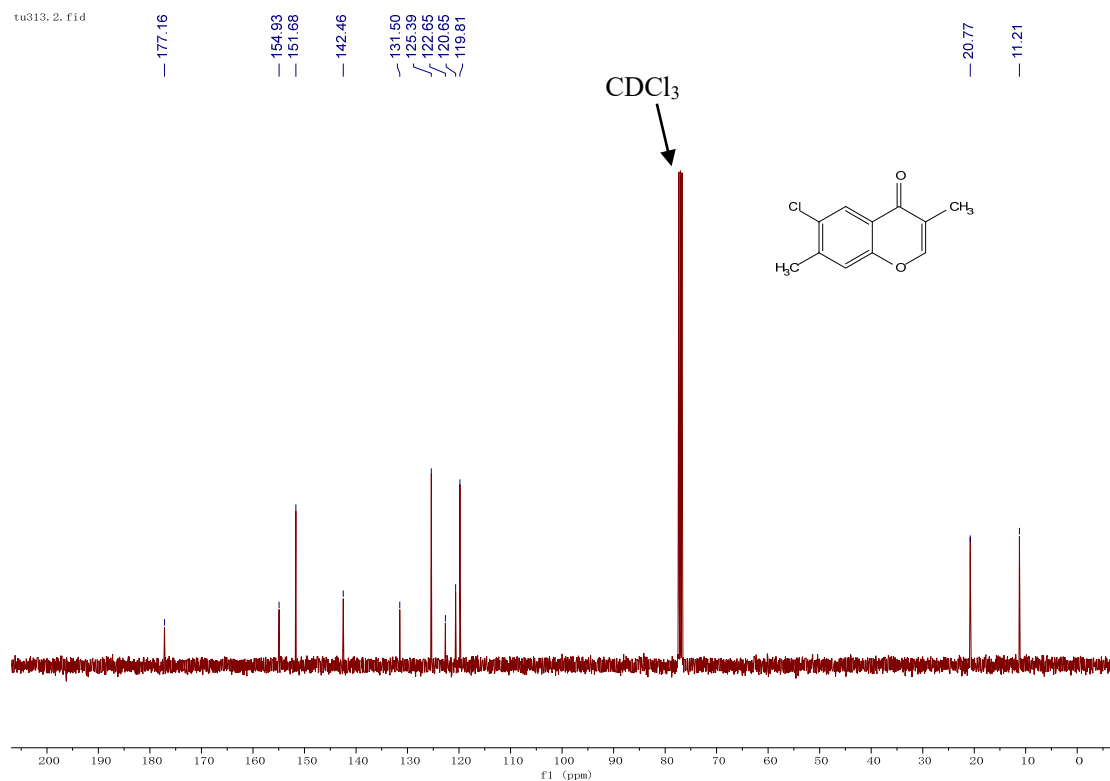

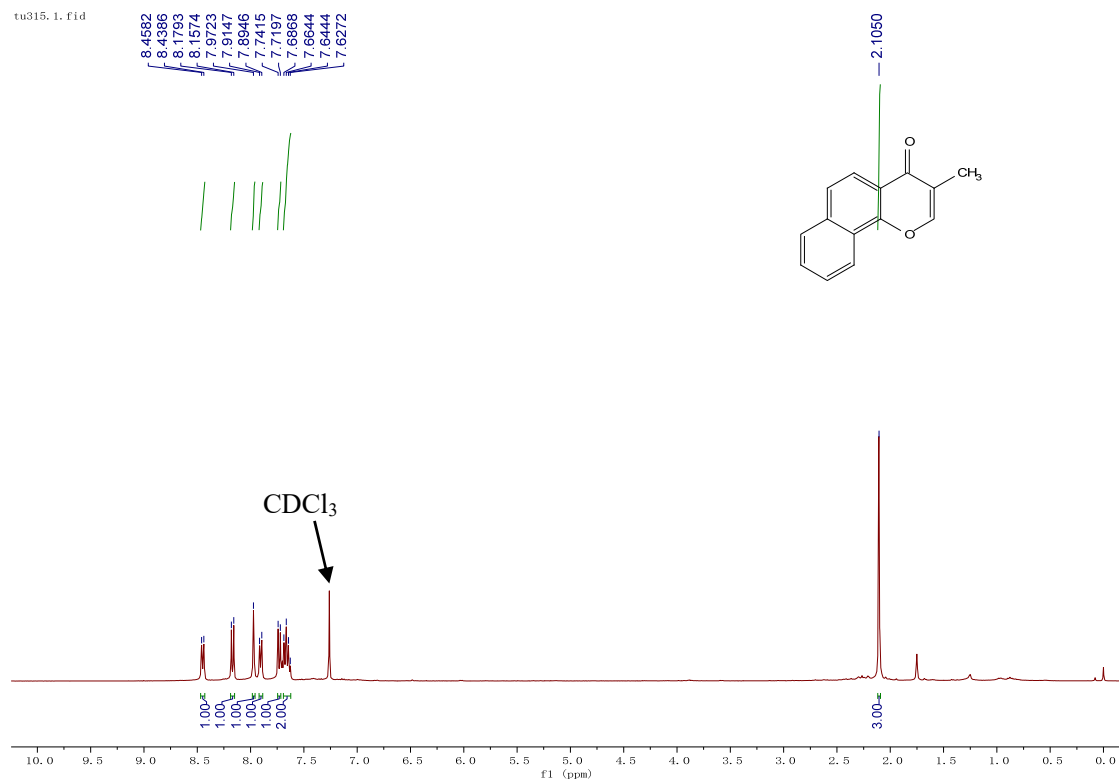

<sup>1</sup>H NMR spectrum of **4j** (400 MHz, CDCl<sub>3</sub>)

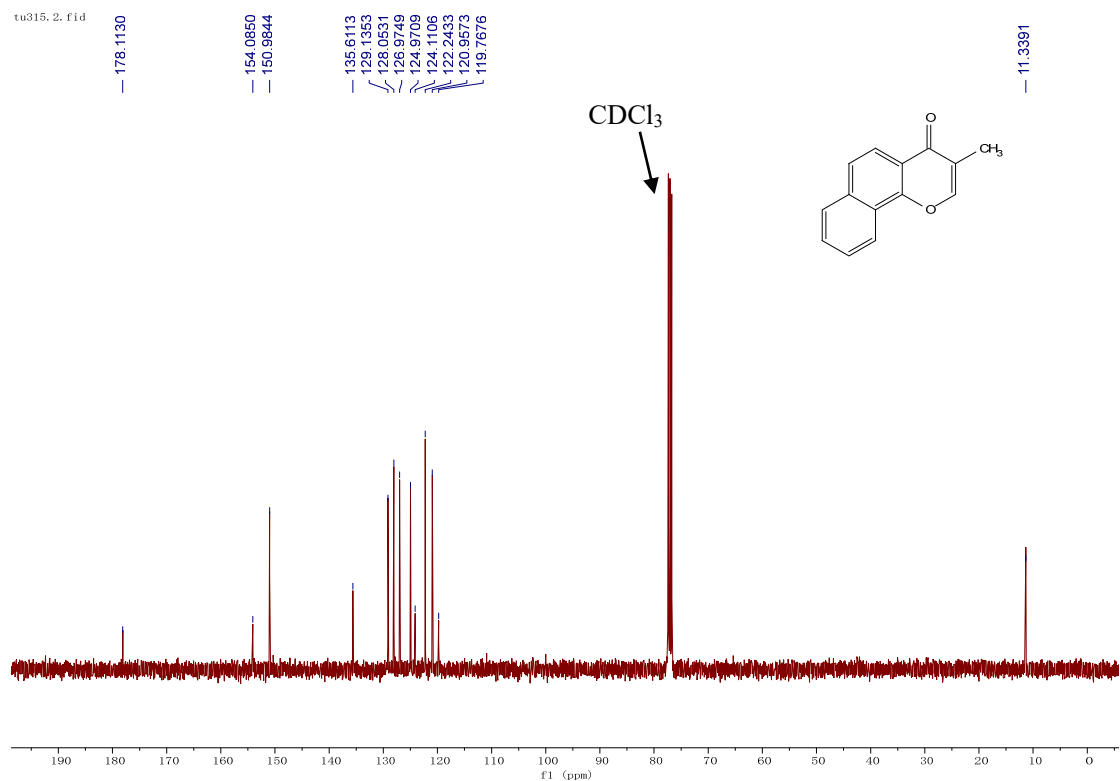

<sup>13</sup>C NMR spectrum of **4j** (100 MHz, CDCl<sub>3</sub>)
